# Supplementary material
Source: HighWire-hosted journal article supplement (https://jnis.bmj.com/content/neurintsurg-2022-019080)
Supplement: inline-supplementary-material-2 [file inline-supplementary-material-2.pdf]

### ICMJE DISCLOSURE FORM

**Date:** 6/7/2022

**Your Name:** Taisuke Akimoto

**Manuscript Title:** Preoperative tumor embolization prolongs time to recurrence of meningiomas: A retrospective propensity-matched analysis

**Manuscript Number (if known):** neurintsurg-2022-019080

In the interest of transparency, we ask you to disclose all relationships/activities/interests listed below that are related to the content of your manuscript. "Related" means any relation with for-profit or not-for-profit third parties whose interests may be affected by the content of the manuscript. Disclosure represents a commitment to transparency and does not necessarily indicate a bias. If you are in doubt about whether to list a relationship/activity/interest, it is preferable that you do so.

The author's relationships/activities/interests should be defined broadly. For example, if your manuscript pertains to the epidemiology of hypertension, you should declare all relationships with manufacturers of antihypertensive medication, even if that medication is not mentioned in the manuscript.

In item #1 below, report all support for the work reported in this manuscript without time limit. For all other items, the time frame for disclosure is the past 36 months.

|                                                           |                                                                                                                                                                                | Name all entities with whom you have this relationship or indicate none (add rows as needed)                                                                             | Specifications/Comments (e.g., if payments were made to you or to your institution) |  |  |  |  |  |                                                                                                                                                                          |  |  |  |  |  |  |
|-----------------------------------------------------------|--------------------------------------------------------------------------------------------------------------------------------------------------------------------------------|--------------------------------------------------------------------------------------------------------------------------------------------------------------------------|-------------------------------------------------------------------------------------|--|--|--|--|--|--------------------------------------------------------------------------------------------------------------------------------------------------------------------------|--|--|--|--|--|--|
| <b>Time frame: Since the initial planning of the work</b> |                                                                                                                                                                                |                                                                                                                                                                          |                                                                                     |  |  |  |  |  |                                                                                                                                                                          |  |  |  |  |  |  |
| <b>1</b>                                                  | All support for the present manuscript (e.g., funding, provision of study materials, medical writing, article processing charges, etc.)<br><b>No time limit for this item.</b> | <input checked="" type="checkbox"/> <b>None</b>                                                                                                                          |                                                                                     |  |  |  |  |  |                                                                                                                                                                          |  |  |  |  |  |  |
|                                                           |                                                                                                                                                                                | <table border="1" style="width: 100%;"><tr><td style="width: 50%;"></td><td style="width: 50%;"></td></tr><tr><td></td><td></td></tr><tr><td></td><td></td></tr></table> |                                                                                     |  |  |  |  |  | <table border="1" style="width: 100%;"><tr><td style="width: 50%;"></td><td style="width: 50%;"></td></tr><tr><td></td><td></td></tr><tr><td></td><td></td></tr></table> |  |  |  |  |  |  |
|                                                           |                                                                                                                                                                                |                                                                                                                                                                          |                                                                                     |  |  |  |  |  |                                                                                                                                                                          |  |  |  |  |  |  |
|                                                           |                                                                                                                                                                                |                                                                                                                                                                          |                                                                                     |  |  |  |  |  |                                                                                                                                                                          |  |  |  |  |  |  |
|                                                           |                                                                                                                                                                                |                                                                                                                                                                          |                                                                                     |  |  |  |  |  |                                                                                                                                                                          |  |  |  |  |  |  |
|                                                           |                                                                                                                                                                                |                                                                                                                                                                          |                                                                                     |  |  |  |  |  |                                                                                                                                                                          |  |  |  |  |  |  |
|                                                           |                                                                                                                                                                                |                                                                                                                                                                          |                                                                                     |  |  |  |  |  |                                                                                                                                                                          |  |  |  |  |  |  |
|                                                           |                                                                                                                                                                                |                                                                                                                                                                          |                                                                                     |  |  |  |  |  |                                                                                                                                                                          |  |  |  |  |  |  |
| <b>Time frame: past 36 months</b>                         |                                                                                                                                                                                |                                                                                                                                                                          |                                                                                     |  |  |  |  |  |                                                                                                                                                                          |  |  |  |  |  |  |
| <b>2</b>                                                  | Grants or contracts from any entity (if not indicated in item #1 above).                                                                                                       | <input checked="" type="checkbox"/> <b>None</b>                                                                                                                          |                                                                                     |  |  |  |  |  |                                                                                                                                                                          |  |  |  |  |  |  |
|                                                           |                                                                                                                                                                                | <table border="1" style="width: 100%;"><tr><td style="width: 50%;"></td><td style="width: 50%;"></td></tr><tr><td></td><td></td></tr><tr><td></td><td></td></tr></table> |                                                                                     |  |  |  |  |  | <table border="1" style="width: 100%;"><tr><td style="width: 50%;"></td><td style="width: 50%;"></td></tr><tr><td></td><td></td></tr><tr><td></td><td></td></tr></table> |  |  |  |  |  |  |
|                                                           |                                                                                                                                                                                |                                                                                                                                                                          |                                                                                     |  |  |  |  |  |                                                                                                                                                                          |  |  |  |  |  |  |
|                                                           |                                                                                                                                                                                |                                                                                                                                                                          |                                                                                     |  |  |  |  |  |                                                                                                                                                                          |  |  |  |  |  |  |
|                                                           |                                                                                                                                                                                |                                                                                                                                                                          |                                                                                     |  |  |  |  |  |                                                                                                                                                                          |  |  |  |  |  |  |
|                                                           |                                                                                                                                                                                |                                                                                                                                                                          |                                                                                     |  |  |  |  |  |                                                                                                                                                                          |  |  |  |  |  |  |
|                                                           |                                                                                                                                                                                |                                                                                                                                                                          |                                                                                     |  |  |  |  |  |                                                                                                                                                                          |  |  |  |  |  |  |
|                                                           |                                                                                                                                                                                |                                                                                                                                                                          |                                                                                     |  |  |  |  |  |                                                                                                                                                                          |  |  |  |  |  |  |
| <b>3</b>                                                  | Royalties or licenses                                                                                                                                                          | <input checked="" type="checkbox"/> <b>None</b>                                                                                                                          |                                                                                     |  |  |  |  |  |                                                                                                                                                                          |  |  |  |  |  |  |
|                                                           |                                                                                                                                                                                | <table border="1" style="width: 100%;"><tr><td style="width: 50%;"></td><td style="width: 50%;"></td></tr><tr><td></td><td></td></tr><tr><td></td><td></td></tr></table> |                                                                                     |  |  |  |  |  | <table border="1" style="width: 100%;"><tr><td style="width: 50%;"></td><td style="width: 50%;"></td></tr><tr><td></td><td></td></tr><tr><td></td><td></td></tr></table> |  |  |  |  |  |  |
|                                                           |                                                                                                                                                                                |                                                                                                                                                                          |                                                                                     |  |  |  |  |  |                                                                                                                                                                          |  |  |  |  |  |  |
|                                                           |                                                                                                                                                                                |                                                                                                                                                                          |                                                                                     |  |  |  |  |  |                                                                                                                                                                          |  |  |  |  |  |  |
|                                                           |                                                                                                                                                                                |                                                                                                                                                                          |                                                                                     |  |  |  |  |  |                                                                                                                                                                          |  |  |  |  |  |  |
|                                                           |                                                                                                                                                                                |                                                                                                                                                                          |                                                                                     |  |  |  |  |  |                                                                                                                                                                          |  |  |  |  |  |  |
|                                                           |                                                                                                                                                                                |                                                                                                                                                                          |                                                                                     |  |  |  |  |  |                                                                                                                                                                          |  |  |  |  |  |  |
|                                                           |                                                                                                                                                                                |                                                                                                                                                                          |                                                                                     |  |  |  |  |  |                                                                                                                                                                          |  |  |  |  |  |  |

|    |                                                                                                              | Name all entities with whom you have this relationship or indicate none (add rows as needed)                                                                                          | Specifications/Comments (e.g., if payments were made to you or to your institution) |  |  |  |  |  |  |
|----|--------------------------------------------------------------------------------------------------------------|---------------------------------------------------------------------------------------------------------------------------------------------------------------------------------------|-------------------------------------------------------------------------------------|--|--|--|--|--|--|
| 4  | Consulting fees                                                                                              | <input checked="" type="checkbox"/> None<br><br><table border="1" style="width:100%;"><tr><td> </td><td> </td></tr><tr><td> </td><td> </td></tr><tr><td> </td><td> </td></tr></table> |                                                                                     |  |  |  |  |  |  |
|    |                                                                                                              |                                                                                                                                                                                       |                                                                                     |  |  |  |  |  |  |
|    |                                                                                                              |                                                                                                                                                                                       |                                                                                     |  |  |  |  |  |  |
|    |                                                                                                              |                                                                                                                                                                                       |                                                                                     |  |  |  |  |  |  |
| 5  | Payment or honoraria for lectures, presentations, speakers bureaus, manuscript writing or educational events | <input checked="" type="checkbox"/> None<br><br><table border="1" style="width:100%;"><tr><td> </td><td> </td></tr><tr><td> </td><td> </td></tr></table>                              |                                                                                     |  |  |  |  |  |  |
|    |                                                                                                              |                                                                                                                                                                                       |                                                                                     |  |  |  |  |  |  |
|    |                                                                                                              |                                                                                                                                                                                       |                                                                                     |  |  |  |  |  |  |
| 6  | Payment for expert testimony                                                                                 | <input checked="" type="checkbox"/> None<br><br><table border="1" style="width:100%;"><tr><td> </td><td> </td></tr><tr><td> </td><td> </td></tr></table>                              |                                                                                     |  |  |  |  |  |  |
|    |                                                                                                              |                                                                                                                                                                                       |                                                                                     |  |  |  |  |  |  |
|    |                                                                                                              |                                                                                                                                                                                       |                                                                                     |  |  |  |  |  |  |
| 7  | Support for attending meetings and/or travel                                                                 | <input checked="" type="checkbox"/> None<br><br><table border="1" style="width:100%;"><tr><td> </td><td> </td></tr><tr><td> </td><td> </td></tr></table>                              |                                                                                     |  |  |  |  |  |  |
|    |                                                                                                              |                                                                                                                                                                                       |                                                                                     |  |  |  |  |  |  |
|    |                                                                                                              |                                                                                                                                                                                       |                                                                                     |  |  |  |  |  |  |
| 8  | Patents planned, issued or pending                                                                           | <input checked="" type="checkbox"/> None<br><br><table border="1" style="width:100%;"><tr><td> </td><td> </td></tr><tr><td> </td><td> </td></tr></table>                              |                                                                                     |  |  |  |  |  |  |
|    |                                                                                                              |                                                                                                                                                                                       |                                                                                     |  |  |  |  |  |  |
|    |                                                                                                              |                                                                                                                                                                                       |                                                                                     |  |  |  |  |  |  |
| 9  | Participation on a Data Safety Monitoring Board or Advisory Board                                            | <input checked="" type="checkbox"/> None<br><br><table border="1" style="width:100%;"><tr><td> </td><td> </td></tr><tr><td> </td><td> </td></tr></table>                              |                                                                                     |  |  |  |  |  |  |
|    |                                                                                                              |                                                                                                                                                                                       |                                                                                     |  |  |  |  |  |  |
|    |                                                                                                              |                                                                                                                                                                                       |                                                                                     |  |  |  |  |  |  |
| 10 | Leadership or fiduciary role in other board, society, committee or advocacy group, paid or unpaid            | <input checked="" type="checkbox"/> None<br><br><table border="1" style="width:100%;"><tr><td> </td><td> </td></tr><tr><td> </td><td> </td></tr></table>                              |                                                                                     |  |  |  |  |  |  |
|    |                                                                                                              |                                                                                                                                                                                       |                                                                                     |  |  |  |  |  |  |
|    |                                                                                                              |                                                                                                                                                                                       |                                                                                     |  |  |  |  |  |  |

|                                                                                                                                                                                                                                                               |                                                                                  | Name all entities with whom you have this relationship or indicate none (add rows as needed)                                                              | Specifications/Comments (e.g., if payments were made to you or to your institution) |  |  |  |  |
|---------------------------------------------------------------------------------------------------------------------------------------------------------------------------------------------------------------------------------------------------------------|----------------------------------------------------------------------------------|-----------------------------------------------------------------------------------------------------------------------------------------------------------|-------------------------------------------------------------------------------------|--|--|--|--|
| <b>11</b>                                                                                                                                                                                                                                                     | Stock or stock options                                                           | <input checked="" type="checkbox"/> None<br><br><table border="1" style="width: 100%;"><tr><td> </td><td> </td></tr><tr><td> </td><td> </td></tr></table> |                                                                                     |  |  |  |  |
|                                                                                                                                                                                                                                                               |                                                                                  |                                                                                                                                                           |                                                                                     |  |  |  |  |
|                                                                                                                                                                                                                                                               |                                                                                  |                                                                                                                                                           |                                                                                     |  |  |  |  |
| <b>12</b>                                                                                                                                                                                                                                                     | Receipt of equipment, materials, drugs, medical writing, gifts or other services | <input checked="" type="checkbox"/> None<br><br><table border="1" style="width: 100%;"><tr><td> </td><td> </td></tr><tr><td> </td><td> </td></tr></table> |                                                                                     |  |  |  |  |
|                                                                                                                                                                                                                                                               |                                                                                  |                                                                                                                                                           |                                                                                     |  |  |  |  |
|                                                                                                                                                                                                                                                               |                                                                                  |                                                                                                                                                           |                                                                                     |  |  |  |  |
| <b>13</b>                                                                                                                                                                                                                                                     | Other financial or non-financial interests                                       | <input checked="" type="checkbox"/> None<br><br><table border="1" style="width: 100%;"><tr><td> </td><td> </td></tr><tr><td> </td><td> </td></tr></table> |                                                                                     |  |  |  |  |
|                                                                                                                                                                                                                                                               |                                                                                  |                                                                                                                                                           |                                                                                     |  |  |  |  |
|                                                                                                                                                                                                                                                               |                                                                                  |                                                                                                                                                           |                                                                                     |  |  |  |  |
| <p><b>Please place an "X" next to the following statement to indicate your agreement:</b></p> <p><input checked="" type="checkbox"/> I certify that I have answered every question and have not altered the wording of any of the questions on this form.</p> |                                                                                  |                                                                                                                                                           |                                                                                     |  |  |  |  |

### ICMJE DISCLOSURE FORM

**Date:** 6/7/2022

**Your Name:** Makoto Ohtake

**Manuscript Title:** Preoperative tumor embolization prolongs time to recurrence of meningiomas: A retrospective propensity-matched analysis

**Manuscript Number (if known):** neurintsurg-2022-019080

In the interest of transparency, we ask you to disclose all relationships/activities/interests listed below that are related to the content of your manuscript. "Related" means any relation with for-profit or not-for-profit third parties whose interests may be affected by the content of the manuscript. Disclosure represents a commitment to transparency and does not necessarily indicate a bias. If you are in doubt about whether to list a relationship/activity/interest, it is preferable that you do so.

The author's relationships/activities/interests should be defined broadly. For example, if your manuscript pertains to the epidemiology of hypertension, you should declare all relationships with manufacturers of antihypertensive medication, even if that medication is not mentioned in the manuscript.

In item #1 below, report all support for the work reported in this manuscript without time limit. For all other items, the time frame for disclosure is the past 36 months.

|                                                           |                                                                                                                                                                                | Name all entities with whom you have this relationship or indicate none (add rows as needed)                                               | Specifications/Comments (e.g., if payments were made to you or to your institution) |  |  |  |  |  |  |
|-----------------------------------------------------------|--------------------------------------------------------------------------------------------------------------------------------------------------------------------------------|--------------------------------------------------------------------------------------------------------------------------------------------|-------------------------------------------------------------------------------------|--|--|--|--|--|--|
| <b>Time frame: Since the initial planning of the work</b> |                                                                                                                                                                                |                                                                                                                                            |                                                                                     |  |  |  |  |  |  |
| <b>1</b>                                                  | All support for the present manuscript (e.g., funding, provision of study materials, medical writing, article processing charges, etc.)<br><b>No time limit for this item.</b> | <input checked="" type="checkbox"/> None                                                                                                   |                                                                                     |  |  |  |  |  |  |
|                                                           |                                                                                                                                                                                | <table border="1" style="width: 100%;"> <tr><td> </td><td> </td></tr> <tr><td> </td><td> </td></tr> <tr><td> </td><td> </td></tr> </table> |                                                                                     |  |  |  |  |  |  |
|                                                           |                                                                                                                                                                                |                                                                                                                                            |                                                                                     |  |  |  |  |  |  |
|                                                           |                                                                                                                                                                                |                                                                                                                                            |                                                                                     |  |  |  |  |  |  |
|                                                           |                                                                                                                                                                                |                                                                                                                                            |                                                                                     |  |  |  |  |  |  |
| <b>Time frame: past 36 months</b>                         |                                                                                                                                                                                |                                                                                                                                            |                                                                                     |  |  |  |  |  |  |
| <b>2</b>                                                  | Grants or contracts from any entity (if not indicated in item #1 above).                                                                                                       | <input checked="" type="checkbox"/> None                                                                                                   |                                                                                     |  |  |  |  |  |  |
|                                                           |                                                                                                                                                                                | <table border="1" style="width: 100%;"> <tr><td> </td><td> </td></tr> <tr><td> </td><td> </td></tr> <tr><td> </td><td> </td></tr> </table> |                                                                                     |  |  |  |  |  |  |
|                                                           |                                                                                                                                                                                |                                                                                                                                            |                                                                                     |  |  |  |  |  |  |
|                                                           |                                                                                                                                                                                |                                                                                                                                            |                                                                                     |  |  |  |  |  |  |
|                                                           |                                                                                                                                                                                |                                                                                                                                            |                                                                                     |  |  |  |  |  |  |
| <b>3</b>                                                  | Royalties or licenses                                                                                                                                                          | <input checked="" type="checkbox"/> None                                                                                                   |                                                                                     |  |  |  |  |  |  |
|                                                           |                                                                                                                                                                                | <table border="1" style="width: 100%;"> <tr><td> </td><td> </td></tr> <tr><td> </td><td> </td></tr> <tr><td> </td><td> </td></tr> </table> |                                                                                     |  |  |  |  |  |  |
|                                                           |                                                                                                                                                                                |                                                                                                                                            |                                                                                     |  |  |  |  |  |  |
|                                                           |                                                                                                                                                                                |                                                                                                                                            |                                                                                     |  |  |  |  |  |  |
|                                                           |                                                                                                                                                                                |                                                                                                                                            |                                                                                     |  |  |  |  |  |  |

|    |                                                                                                              | Name all entities with whom you have this relationship or indicate none (add rows as needed) | Specifications/Comments (e.g., if payments were made to you or to your institution) |
|----|--------------------------------------------------------------------------------------------------------------|----------------------------------------------------------------------------------------------|-------------------------------------------------------------------------------------|
| 4  | Consulting fees                                                                                              | <input checked="" type="checkbox"/> None                                                     |                                                                                     |
|    |                                                                                                              |                                                                                              |                                                                                     |
|    |                                                                                                              |                                                                                              |                                                                                     |
|    |                                                                                                              |                                                                                              |                                                                                     |
| 5  | Payment or honoraria for lectures, presentations, speakers bureaus, manuscript writing or educational events | <input checked="" type="checkbox"/> None                                                     |                                                                                     |
|    |                                                                                                              |                                                                                              |                                                                                     |
|    |                                                                                                              |                                                                                              |                                                                                     |
|    |                                                                                                              |                                                                                              |                                                                                     |
| 6  | Payment for expert testimony                                                                                 | <input checked="" type="checkbox"/> None                                                     |                                                                                     |
|    |                                                                                                              |                                                                                              |                                                                                     |
|    |                                                                                                              |                                                                                              |                                                                                     |
|    |                                                                                                              |                                                                                              |                                                                                     |
| 7  | Support for attending meetings and/or travel                                                                 | <input checked="" type="checkbox"/> None                                                     |                                                                                     |
|    |                                                                                                              |                                                                                              |                                                                                     |
|    |                                                                                                              |                                                                                              |                                                                                     |
|    |                                                                                                              |                                                                                              |                                                                                     |
| 8  | Patents planned, issued or pending                                                                           | <input checked="" type="checkbox"/> None                                                     |                                                                                     |
|    |                                                                                                              |                                                                                              |                                                                                     |
|    |                                                                                                              |                                                                                              |                                                                                     |
|    |                                                                                                              |                                                                                              |                                                                                     |
| 9  | Participation on a Data Safety Monitoring Board or Advisory Board                                            | <input checked="" type="checkbox"/> None                                                     |                                                                                     |
|    |                                                                                                              |                                                                                              |                                                                                     |
|    |                                                                                                              |                                                                                              |                                                                                     |
|    |                                                                                                              |                                                                                              |                                                                                     |
| 10 | Leadership or fiduciary role in other board, society, committee or advocacy group, paid or unpaid            | <input checked="" type="checkbox"/> None                                                     |                                                                                     |
|    |                                                                                                              |                                                                                              |                                                                                     |
|    |                                                                                                              |                                                                                              |                                                                                     |
|    |                                                                                                              |                                                                                              |                                                                                     |

|                                                                                                                                                                                                                                                               |                                                                                  | Name all entities with whom you have this relationship or indicate none (add rows as needed) | Specifications/Comments (e.g., if payments were made to you or to your institution) |
|---------------------------------------------------------------------------------------------------------------------------------------------------------------------------------------------------------------------------------------------------------------|----------------------------------------------------------------------------------|----------------------------------------------------------------------------------------------|-------------------------------------------------------------------------------------|
| <b>11</b>                                                                                                                                                                                                                                                     | Stock or stock options                                                           | <input checked="" type="checkbox"/> None                                                     |                                                                                     |
|                                                                                                                                                                                                                                                               |                                                                                  |                                                                                              |                                                                                     |
|                                                                                                                                                                                                                                                               |                                                                                  |                                                                                              |                                                                                     |
| <b>12</b>                                                                                                                                                                                                                                                     | Receipt of equipment, materials, drugs, medical writing, gifts or other services | <input checked="" type="checkbox"/> None                                                     |                                                                                     |
|                                                                                                                                                                                                                                                               |                                                                                  |                                                                                              |                                                                                     |
|                                                                                                                                                                                                                                                               |                                                                                  |                                                                                              |                                                                                     |
| <b>13</b>                                                                                                                                                                                                                                                     | Other financial or non-financial interests                                       | <input checked="" type="checkbox"/> None                                                     |                                                                                     |
|                                                                                                                                                                                                                                                               |                                                                                  |                                                                                              |                                                                                     |
|                                                                                                                                                                                                                                                               |                                                                                  |                                                                                              |                                                                                     |
| <p><b>Please place an "X" next to the following statement to indicate your agreement:</b></p> <p><input checked="" type="checkbox"/> I certify that I have answered every question and have not altered the wording of any of the questions on this form.</p> |                                                                                  |                                                                                              |                                                                                     |

### ICMJE DISCLOSURE FORM

**Date:** 6/7/2022

**Your Name:** Shigeta Miyake

**Manuscript Title:** Preoperative tumor embolization prolongs time to recurrence of meningiomas: A retrospective propensity-matched analysis

**Manuscript Number (if known):** neurintsurg-2022-019080

In the interest of transparency, we ask you to disclose all relationships/activities/interests listed below that are related to the content of your manuscript. "Related" means any relation with for-profit or not-for-profit third parties whose interests may be affected by the content of the manuscript. Disclosure represents a commitment to transparency and does not necessarily indicate a bias. If you are in doubt about whether to list a relationship/activity/interest, it is preferable that you do so.

The author's relationships/activities/interests should be defined broadly. For example, if your manuscript pertains to the epidemiology of hypertension, you should declare all relationships with manufacturers of antihypertensive medication, even if that medication is not mentioned in the manuscript.

In item #1 below, report all support for the work reported in this manuscript without time limit. For all other items, the time frame for disclosure is the past 36 months.

|                                                           |                                                                                                                                                                                | Name all entities with whom you have this relationship or indicate none (add rows as needed) | Specifications/Comments (e.g., if payments were made to you or to your institution) |
|-----------------------------------------------------------|--------------------------------------------------------------------------------------------------------------------------------------------------------------------------------|----------------------------------------------------------------------------------------------|-------------------------------------------------------------------------------------|
| <b>Time frame: Since the initial planning of the work</b> |                                                                                                                                                                                |                                                                                              |                                                                                     |
| <b>1</b>                                                  | All support for the present manuscript (e.g., funding, provision of study materials, medical writing, article processing charges, etc.)<br><b>No time limit for this item.</b> | <input checked="" type="checkbox"/> None                                                     |                                                                                     |
|                                                           |                                                                                                                                                                                |                                                                                              |                                                                                     |
|                                                           |                                                                                                                                                                                |                                                                                              | Click the tab key to add additional rows                                            |
| <b>Time frame: past 36 months</b>                         |                                                                                                                                                                                |                                                                                              |                                                                                     |
| <b>2</b>                                                  | Grants or contracts from any entity (if not indicated in item #1 above).                                                                                                       | <input checked="" type="checkbox"/> None                                                     |                                                                                     |
|                                                           |                                                                                                                                                                                |                                                                                              |                                                                                     |
|                                                           |                                                                                                                                                                                |                                                                                              |                                                                                     |
| <b>3</b>                                                  | Royalties or licenses                                                                                                                                                          | <input checked="" type="checkbox"/> None                                                     |                                                                                     |
|                                                           |                                                                                                                                                                                |                                                                                              |                                                                                     |
|                                                           |                                                                                                                                                                                |                                                                                              |                                                                                     |

|    |                                                                                                              | Name all entities with whom you have this relationship or indicate none (add rows as needed) | Specifications/Comments (e.g., if payments were made to you or to your institution) |
|----|--------------------------------------------------------------------------------------------------------------|----------------------------------------------------------------------------------------------|-------------------------------------------------------------------------------------|
| 4  | Consulting fees                                                                                              | <input checked="" type="checkbox"/> None                                                     |                                                                                     |
|    |                                                                                                              |                                                                                              |                                                                                     |
|    |                                                                                                              |                                                                                              |                                                                                     |
|    |                                                                                                              |                                                                                              |                                                                                     |
| 5  | Payment or honoraria for lectures, presentations, speakers bureaus, manuscript writing or educational events | <input checked="" type="checkbox"/> None                                                     |                                                                                     |
|    |                                                                                                              |                                                                                              |                                                                                     |
|    |                                                                                                              |                                                                                              |                                                                                     |
|    |                                                                                                              |                                                                                              |                                                                                     |
| 6  | Payment for expert testimony                                                                                 | <input checked="" type="checkbox"/> None                                                     |                                                                                     |
|    |                                                                                                              |                                                                                              |                                                                                     |
|    |                                                                                                              |                                                                                              |                                                                                     |
|    |                                                                                                              |                                                                                              |                                                                                     |
| 7  | Support for attending meetings and/or travel                                                                 | <input checked="" type="checkbox"/> None                                                     |                                                                                     |
|    |                                                                                                              |                                                                                              |                                                                                     |
|    |                                                                                                              |                                                                                              |                                                                                     |
|    |                                                                                                              |                                                                                              |                                                                                     |
| 8  | Patents planned, issued or pending                                                                           | <input checked="" type="checkbox"/> None                                                     |                                                                                     |
|    |                                                                                                              |                                                                                              |                                                                                     |
|    |                                                                                                              |                                                                                              |                                                                                     |
|    |                                                                                                              |                                                                                              |                                                                                     |
| 9  | Participation on a Data Safety Monitoring Board or Advisory Board                                            | <input checked="" type="checkbox"/> None                                                     |                                                                                     |
|    |                                                                                                              |                                                                                              |                                                                                     |
|    |                                                                                                              |                                                                                              |                                                                                     |
|    |                                                                                                              |                                                                                              |                                                                                     |
| 10 | Leadership or fiduciary role in other board, society, committee or advocacy group, paid or unpaid            | <input checked="" type="checkbox"/> None                                                     |                                                                                     |
|    |                                                                                                              |                                                                                              |                                                                                     |
|    |                                                                                                              |                                                                                              |                                                                                     |
|    |                                                                                                              |                                                                                              |                                                                                     |



|    |                                                                                  | Name all entities with whom you have this relationship or indicate none (add rows as needed) | Specifications/Comments (e.g., if payments were made to you or to your institution) |
|----|----------------------------------------------------------------------------------|----------------------------------------------------------------------------------------------|-------------------------------------------------------------------------------------|
| 11 | Stock or stock options                                                           | <input checked="" type="checkbox"/> None                                                     |                                                                                     |
|    |                                                                                  |                                                                                              |                                                                                     |
|    |                                                                                  |                                                                                              |                                                                                     |
| 12 | Receipt of equipment, materials, drugs, medical writing, gifts or other services | <input checked="" type="checkbox"/> None                                                     |                                                                                     |
|    |                                                                                  |                                                                                              |                                                                                     |
|    |                                                                                  |                                                                                              |                                                                                     |
| 13 | Other financial or non-financial interests                                       | <input checked="" type="checkbox"/> None                                                     |                                                                                     |
|    |                                                                                  |                                                                                              |                                                                                     |
|    |                                                                                  |                                                                                              |                                                                                     |

Please place an "X" next to the following statement to indicate your agreement:

I certify that I have answered every question and have not altered the wording of any of the questions on this form.

### ICMJE DISCLOSURE FORM

**Date:** 6/7/2022

**Your Name:** Ryosuke Suzuki

**Manuscript Title:** Preoperative tumor embolization prolongs time to recurrence of meningiomas: A retrospective propensity-matched analysis

**Manuscript Number (if known):** neurintsurg-2022-019080

In the interest of transparency, we ask you to disclose all relationships/activities/interests listed below that are related to the content of your manuscript. "Related" means any relation with for-profit or not-for-profit third parties whose interests may be affected by the content of the manuscript. Disclosure represents a commitment to transparency and does not necessarily indicate a bias. If you are in doubt about whether to list a relationship/activity/interest, it is preferable that you do so.

The author's relationships/activities/interests should be defined broadly. For example, if your manuscript pertains to the epidemiology of hypertension, you should declare all relationships with manufacturers of antihypertensive medication, even if that medication is not mentioned in the manuscript.

In item #1 below, report all support for the work reported in this manuscript without time limit. For all other items, the time frame for disclosure is the past 36 months.

|                                                           |                                                                                                                                                                                | Name all entities with whom you have this relationship or indicate none (add rows as needed)                                                                                                                                       | Specifications/Comments (e.g., if payments were made to you or to your institution) |  |  |  |  |  |                                                         |
|-----------------------------------------------------------|--------------------------------------------------------------------------------------------------------------------------------------------------------------------------------|------------------------------------------------------------------------------------------------------------------------------------------------------------------------------------------------------------------------------------|-------------------------------------------------------------------------------------|--|--|--|--|--|---------------------------------------------------------|
| <b>Time frame: Since the initial planning of the work</b> |                                                                                                                                                                                |                                                                                                                                                                                                                                    |                                                                                     |  |  |  |  |  |                                                         |
| <b>1</b>                                                  | All support for the present manuscript (e.g., funding, provision of study materials, medical writing, article processing charges, etc.)<br><b>No time limit for this item.</b> | <input checked="" type="checkbox"/> None                                                                                                                                                                                           |                                                                                     |  |  |  |  |  |                                                         |
|                                                           |                                                                                                                                                                                | <table border="1" style="width: 100%;"><tr><td style="width: 50%; height: 20px;"></td><td style="width: 50%;"></td></tr><tr><td style="height: 20px;"></td><td></td></tr><tr><td style="height: 20px;"></td><td></td></tr></table> |                                                                                     |  |  |  |  |  | <small>Click the Tab key to add additional rows</small> |
|                                                           |                                                                                                                                                                                |                                                                                                                                                                                                                                    |                                                                                     |  |  |  |  |  |                                                         |
|                                                           |                                                                                                                                                                                |                                                                                                                                                                                                                                    |                                                                                     |  |  |  |  |  |                                                         |
|                                                           |                                                                                                                                                                                |                                                                                                                                                                                                                                    |                                                                                     |  |  |  |  |  |                                                         |
| <b>Time frame: past 36 months</b>                         |                                                                                                                                                                                |                                                                                                                                                                                                                                    |                                                                                     |  |  |  |  |  |                                                         |
| <b>2</b>                                                  | Grants or contracts from any entity (if not indicated in item #1 above).                                                                                                       | <input checked="" type="checkbox"/> None                                                                                                                                                                                           |                                                                                     |  |  |  |  |  |                                                         |
|                                                           |                                                                                                                                                                                | <table border="1" style="width: 100%;"><tr><td style="width: 50%; height: 20px;"></td><td style="width: 50%;"></td></tr><tr><td style="height: 20px;"></td><td></td></tr><tr><td style="height: 20px;"></td><td></td></tr></table> |                                                                                     |  |  |  |  |  |                                                         |
|                                                           |                                                                                                                                                                                |                                                                                                                                                                                                                                    |                                                                                     |  |  |  |  |  |                                                         |
|                                                           |                                                                                                                                                                                |                                                                                                                                                                                                                                    |                                                                                     |  |  |  |  |  |                                                         |
|                                                           |                                                                                                                                                                                |                                                                                                                                                                                                                                    |                                                                                     |  |  |  |  |  |                                                         |
| <b>3</b>                                                  | Royalties or licenses                                                                                                                                                          | <input checked="" type="checkbox"/> None                                                                                                                                                                                           |                                                                                     |  |  |  |  |  |                                                         |
|                                                           |                                                                                                                                                                                | <table border="1" style="width: 100%;"><tr><td style="width: 50%; height: 20px;"></td><td style="width: 50%;"></td></tr><tr><td style="height: 20px;"></td><td></td></tr><tr><td style="height: 20px;"></td><td></td></tr></table> |                                                                                     |  |  |  |  |  |                                                         |
|                                                           |                                                                                                                                                                                |                                                                                                                                                                                                                                    |                                                                                     |  |  |  |  |  |                                                         |
|                                                           |                                                                                                                                                                                |                                                                                                                                                                                                                                    |                                                                                     |  |  |  |  |  |                                                         |
|                                                           |                                                                                                                                                                                |                                                                                                                                                                                                                                    |                                                                                     |  |  |  |  |  |                                                         |

|    |                                                                                                              | Name all entities with whom you have this relationship or indicate none (add rows as needed) | Specifications/Comments (e.g., if payments were made to you or to your institution) |
|----|--------------------------------------------------------------------------------------------------------------|----------------------------------------------------------------------------------------------|-------------------------------------------------------------------------------------|
| 4  | Consulting fees                                                                                              | <input checked="" type="checkbox"/> None                                                     |                                                                                     |
|    |                                                                                                              |                                                                                              |                                                                                     |
|    |                                                                                                              |                                                                                              |                                                                                     |
|    |                                                                                                              |                                                                                              |                                                                                     |
| 5  | Payment or honoraria for lectures, presentations, speakers bureaus, manuscript writing or educational events | <input checked="" type="checkbox"/> None                                                     |                                                                                     |
|    |                                                                                                              |                                                                                              |                                                                                     |
|    |                                                                                                              |                                                                                              |                                                                                     |
| 6  | Payment for expert testimony                                                                                 | <input checked="" type="checkbox"/> None                                                     |                                                                                     |
|    |                                                                                                              |                                                                                              |                                                                                     |
|    |                                                                                                              |                                                                                              |                                                                                     |
| 7  | Support for attending meetings and/or travel                                                                 | <input checked="" type="checkbox"/> None                                                     |                                                                                     |
|    |                                                                                                              |                                                                                              |                                                                                     |
|    |                                                                                                              |                                                                                              |                                                                                     |
| 8  | Patents planned, issued or pending                                                                           | <input checked="" type="checkbox"/> None                                                     |                                                                                     |
|    |                                                                                                              |                                                                                              |                                                                                     |
|    |                                                                                                              |                                                                                              |                                                                                     |
| 9  | Participation on a Data Safety Monitoring Board or Advisory Board                                            | <input checked="" type="checkbox"/> None                                                     |                                                                                     |
|    |                                                                                                              |                                                                                              |                                                                                     |
|    |                                                                                                              |                                                                                              |                                                                                     |
| 10 | Leadership or fiduciary role in other board, society, committee or advocacy group, paid or unpaid            | <input checked="" type="checkbox"/> None                                                     |                                                                                     |
|    |                                                                                                              |                                                                                              |                                                                                     |
|    |                                                                                                              |                                                                                              |                                                                                     |

|                                                                                                                                                                                                                                                        |                                                                                  | Name all entities with whom you have this relationship or indicate none (add rows as needed) | Specifications/Comments (e.g., if payments were made to you or to your institution) |
|--------------------------------------------------------------------------------------------------------------------------------------------------------------------------------------------------------------------------------------------------------|----------------------------------------------------------------------------------|----------------------------------------------------------------------------------------------|-------------------------------------------------------------------------------------|
| 11                                                                                                                                                                                                                                                     | Stock or stock options                                                           | <input checked="" type="checkbox"/> None                                                     |                                                                                     |
|                                                                                                                                                                                                                                                        |                                                                                  |                                                                                              |                                                                                     |
|                                                                                                                                                                                                                                                        |                                                                                  |                                                                                              |                                                                                     |
| 12                                                                                                                                                                                                                                                     | Receipt of equipment, materials, drugs, medical writing, gifts or other services | <input checked="" type="checkbox"/> None                                                     |                                                                                     |
|                                                                                                                                                                                                                                                        |                                                                                  |                                                                                              |                                                                                     |
|                                                                                                                                                                                                                                                        |                                                                                  |                                                                                              |                                                                                     |
| 13                                                                                                                                                                                                                                                     | Other financial or non-financial interests                                       | <input checked="" type="checkbox"/> None                                                     |                                                                                     |
|                                                                                                                                                                                                                                                        |                                                                                  |                                                                                              |                                                                                     |
|                                                                                                                                                                                                                                                        |                                                                                  |                                                                                              |                                                                                     |
| <p>Please place an "X" next to the following statement to indicate your agreement:</p> <p><input checked="" type="checkbox"/> I certify that I have answered every question and have not altered the wording of any of the questions on this form.</p> |                                                                                  |                                                                                              |                                                                                     |

### ICMJE DISCLOSURE FORM

**Date:** 6/7/2022

**Your Name:** Yu lida

**Manuscript Title:** Preoperative tumor embolization prolongs time to recurrence of meningiomas: A retrospective propensity-matched analysis

**Manuscript Number (if known):** neurintsurg-2022-019080

In the interest of transparency, we ask you to disclose all relationships/activities/interests listed below that are related to the content of your manuscript. "Related" means any relation with for-profit or not-for-profit third parties whose interests may be affected by the content of the manuscript. Disclosure represents a commitment to transparency and does not necessarily indicate a bias. If you are in doubt about whether to list a relationship/activity/interest, it is preferable that you do so.

The author's relationships/activities/interests should be defined broadly. For example, if your manuscript pertains to the epidemiology of hypertension, you should declare all relationships with manufacturers of antihypertensive medication, even if that medication is not mentioned in the manuscript.

In item #1 below, report all support for the work reported in this manuscript without time limit. For all other items, the time frame for disclosure is the past 36 months.

|                                                           |                                                                                                                                                                                | Name all entities with whom you have this relationship or indicate none (add rows as needed)                                               | Specifications/Comments (e.g., if payments were made to you or to your institution) |  |  |  |  |  |  |
|-----------------------------------------------------------|--------------------------------------------------------------------------------------------------------------------------------------------------------------------------------|--------------------------------------------------------------------------------------------------------------------------------------------|-------------------------------------------------------------------------------------|--|--|--|--|--|--|
| <b>Time frame: Since the initial planning of the work</b> |                                                                                                                                                                                |                                                                                                                                            |                                                                                     |  |  |  |  |  |  |
| <b>1</b>                                                  | All support for the present manuscript (e.g., funding, provision of study materials, medical writing, article processing charges, etc.)<br><b>No time limit for this item.</b> | <input checked="" type="checkbox"/> None                                                                                                   |                                                                                     |  |  |  |  |  |  |
|                                                           |                                                                                                                                                                                | <table border="1" style="width: 100%;"> <tr><td> </td><td> </td></tr> <tr><td> </td><td> </td></tr> <tr><td> </td><td> </td></tr> </table> |                                                                                     |  |  |  |  |  |  |
|                                                           |                                                                                                                                                                                |                                                                                                                                            |                                                                                     |  |  |  |  |  |  |
|                                                           |                                                                                                                                                                                |                                                                                                                                            |                                                                                     |  |  |  |  |  |  |
|                                                           |                                                                                                                                                                                |                                                                                                                                            |                                                                                     |  |  |  |  |  |  |
| <b>Time frame: past 36 months</b>                         |                                                                                                                                                                                |                                                                                                                                            |                                                                                     |  |  |  |  |  |  |
| <b>2</b>                                                  | Grants or contracts from any entity (if not indicated in item #1 above).                                                                                                       | <input checked="" type="checkbox"/> None                                                                                                   |                                                                                     |  |  |  |  |  |  |
|                                                           |                                                                                                                                                                                | <table border="1" style="width: 100%;"> <tr><td> </td><td> </td></tr> <tr><td> </td><td> </td></tr> <tr><td> </td><td> </td></tr> </table> |                                                                                     |  |  |  |  |  |  |
|                                                           |                                                                                                                                                                                |                                                                                                                                            |                                                                                     |  |  |  |  |  |  |
|                                                           |                                                                                                                                                                                |                                                                                                                                            |                                                                                     |  |  |  |  |  |  |
|                                                           |                                                                                                                                                                                |                                                                                                                                            |                                                                                     |  |  |  |  |  |  |
| <b>3</b>                                                  | Royalties or licenses                                                                                                                                                          | <input checked="" type="checkbox"/> None                                                                                                   |                                                                                     |  |  |  |  |  |  |
|                                                           |                                                                                                                                                                                | <table border="1" style="width: 100%;"> <tr><td> </td><td> </td></tr> <tr><td> </td><td> </td></tr> <tr><td> </td><td> </td></tr> </table> |                                                                                     |  |  |  |  |  |  |
|                                                           |                                                                                                                                                                                |                                                                                                                                            |                                                                                     |  |  |  |  |  |  |
|                                                           |                                                                                                                                                                                |                                                                                                                                            |                                                                                     |  |  |  |  |  |  |
|                                                           |                                                                                                                                                                                |                                                                                                                                            |                                                                                     |  |  |  |  |  |  |

|    |                                                                                                              | Name all entities with whom you have this relationship or indicate none (add rows as needed) | Specifications/Comments (e.g., if payments were made to you or to your institution) |
|----|--------------------------------------------------------------------------------------------------------------|----------------------------------------------------------------------------------------------|-------------------------------------------------------------------------------------|
| 4  | Consulting fees                                                                                              | <input checked="" type="checkbox"/> None                                                     |                                                                                     |
|    |                                                                                                              |                                                                                              |                                                                                     |
|    |                                                                                                              |                                                                                              |                                                                                     |
|    |                                                                                                              |                                                                                              |                                                                                     |
| 5  | Payment or honoraria for lectures, presentations, speakers bureaus, manuscript writing or educational events | <input checked="" type="checkbox"/> None                                                     |                                                                                     |
|    |                                                                                                              |                                                                                              |                                                                                     |
|    |                                                                                                              |                                                                                              |                                                                                     |
|    |                                                                                                              |                                                                                              |                                                                                     |
| 6  | Payment for expert testimony                                                                                 | <input checked="" type="checkbox"/> None                                                     |                                                                                     |
|    |                                                                                                              |                                                                                              |                                                                                     |
|    |                                                                                                              |                                                                                              |                                                                                     |
|    |                                                                                                              |                                                                                              |                                                                                     |
| 7  | Support for attending meetings and/or travel                                                                 | <input checked="" type="checkbox"/> None                                                     |                                                                                     |
|    |                                                                                                              |                                                                                              |                                                                                     |
|    |                                                                                                              |                                                                                              |                                                                                     |
|    |                                                                                                              |                                                                                              |                                                                                     |
| 8  | Patents planned, issued or pending                                                                           | <input checked="" type="checkbox"/> None                                                     |                                                                                     |
|    |                                                                                                              |                                                                                              |                                                                                     |
|    |                                                                                                              |                                                                                              |                                                                                     |
|    |                                                                                                              |                                                                                              |                                                                                     |
| 9  | Participation on a Data Safety Monitoring Board or Advisory Board                                            | <input checked="" type="checkbox"/> None                                                     |                                                                                     |
|    |                                                                                                              |                                                                                              |                                                                                     |
|    |                                                                                                              |                                                                                              |                                                                                     |
|    |                                                                                                              |                                                                                              |                                                                                     |
| 10 | Leadership or fiduciary role in other board, society, committee or advocacy group, paid or unpaid            | <input checked="" type="checkbox"/> None                                                     |                                                                                     |
|    |                                                                                                              |                                                                                              |                                                                                     |
|    |                                                                                                              |                                                                                              |                                                                                     |
|    |                                                                                                              |                                                                                              |                                                                                     |

|    |                                                                                  | Name all entities with whom you have this relationship or indicate none (add rows as needed) | Specifications/Comments (e.g., if payments were made to you or to your institution) |
|----|----------------------------------------------------------------------------------|----------------------------------------------------------------------------------------------|-------------------------------------------------------------------------------------|
| 11 | Stock or stock options                                                           | <input checked="" type="checkbox"/> None                                                     |                                                                                     |
|    |                                                                                  |                                                                                              |                                                                                     |
|    |                                                                                  |                                                                                              |                                                                                     |
| 12 | Receipt of equipment, materials, drugs, medical writing, gifts or other services | <input checked="" type="checkbox"/> None                                                     |                                                                                     |
|    |                                                                                  |                                                                                              |                                                                                     |
|    |                                                                                  |                                                                                              |                                                                                     |
| 13 | Other financial or non-financial interests                                       | <input checked="" type="checkbox"/> None                                                     |                                                                                     |
|    |                                                                                  |                                                                                              |                                                                                     |
|    |                                                                                  |                                                                                              |                                                                                     |

Please place an "X" next to the following statement to indicate your agreement:

I certify that I have answered every question and have not altered the wording of any of the questions on this form.

## ICMJE DISCLOSURE FORM

**Date:** 6/7/2022

**Your Name:** Wataru Shimohigoshi

**Manuscript Title:** Preoperative tumor embolization prolongs time to recurrence of meningiomas: A retrospective propensity-matched analysis

**Manuscript Number (if known):** neurintsurg-2022-019080

In the interest of transparency, we ask you to disclose all relationships/activities/interests listed below that are related to the content of your manuscript. "Related" means any relation with for-profit or not-for-profit third parties whose interests may be affected by the content of the manuscript. Disclosure represents a commitment to transparency and does not necessarily indicate a bias. If you are in doubt about whether to list a relationship/activity/interest, it is preferable that you do so.

The author's relationships/activities/interests should be defined broadly. For example, if your manuscript pertains to the epidemiology of hypertension, you should declare all relationships with manufacturers of antihypertensive medication, even if that medication is not mentioned in the manuscript.

In item #1 below, report all support for the work reported in this manuscript without time limit. For all other items, the time frame for disclosure is the past 36 months.

|                                                           |                                                                                                                                                                                | Name all entities with whom you have this relationship or indicate none (add rows as needed) | Specifications/Comments (e.g., if payments were made to you or to your institution) |
|-----------------------------------------------------------|--------------------------------------------------------------------------------------------------------------------------------------------------------------------------------|----------------------------------------------------------------------------------------------|-------------------------------------------------------------------------------------|
| <b>Time frame: Since the initial planning of the work</b> |                                                                                                                                                                                |                                                                                              |                                                                                     |
| <b>1</b>                                                  | All support for the present manuscript (e.g., funding, provision of study materials, medical writing, article processing charges, etc.)<br><b>No time limit for this item.</b> | <input checked="" type="checkbox"/> None                                                     |                                                                                     |
|                                                           |                                                                                                                                                                                |                                                                                              |                                                                                     |
|                                                           |                                                                                                                                                                                |                                                                                              | Click the tab key to add additional rows                                            |
| <b>Time frame: past 36 months</b>                         |                                                                                                                                                                                |                                                                                              |                                                                                     |
| <b>2</b>                                                  | Grants or contracts from any entity (if not indicated in item #1 above).                                                                                                       | <input checked="" type="checkbox"/> None                                                     |                                                                                     |
|                                                           |                                                                                                                                                                                |                                                                                              |                                                                                     |
| <b>3</b>                                                  | Royalties or licenses                                                                                                                                                          | <input checked="" type="checkbox"/> None                                                     |                                                                                     |
|                                                           |                                                                                                                                                                                |                                                                                              |                                                                                     |



|    |                                                                                                              | Name all entities with whom you have this relationship or indicate none (add rows as needed) | Specifications/Comments (e.g., if payments were made to you or to your institution) |
|----|--------------------------------------------------------------------------------------------------------------|----------------------------------------------------------------------------------------------|-------------------------------------------------------------------------------------|
| 4  | Consulting fees                                                                                              | <input checked="" type="checkbox"/> None                                                     |                                                                                     |
|    |                                                                                                              |                                                                                              |                                                                                     |
|    |                                                                                                              |                                                                                              |                                                                                     |
|    |                                                                                                              |                                                                                              |                                                                                     |
| 5  | Payment or honoraria for lectures, presentations, speakers bureaus, manuscript writing or educational events | <input checked="" type="checkbox"/> None                                                     |                                                                                     |
|    |                                                                                                              |                                                                                              |                                                                                     |
|    |                                                                                                              |                                                                                              |                                                                                     |
|    |                                                                                                              |                                                                                              |                                                                                     |
| 6  | Payment for expert testimony                                                                                 | <input checked="" type="checkbox"/> None                                                     |                                                                                     |
|    |                                                                                                              |                                                                                              |                                                                                     |
|    |                                                                                                              |                                                                                              |                                                                                     |
|    |                                                                                                              |                                                                                              |                                                                                     |
| 7  | Support for attending meetings and/or travel                                                                 | <input checked="" type="checkbox"/> None                                                     |                                                                                     |
|    |                                                                                                              |                                                                                              |                                                                                     |
|    |                                                                                                              |                                                                                              |                                                                                     |
|    |                                                                                                              |                                                                                              |                                                                                     |
| 8  | Patents planned, issued or pending                                                                           | <input checked="" type="checkbox"/> None                                                     |                                                                                     |
|    |                                                                                                              |                                                                                              |                                                                                     |
|    |                                                                                                              |                                                                                              |                                                                                     |
|    |                                                                                                              |                                                                                              |                                                                                     |
| 9  | Participation on a Data Safety Monitoring Board or Advisory Board                                            | <input checked="" type="checkbox"/> None                                                     |                                                                                     |
|    |                                                                                                              |                                                                                              |                                                                                     |
|    |                                                                                                              |                                                                                              |                                                                                     |
|    |                                                                                                              |                                                                                              |                                                                                     |
| 10 | Leadership or fiduciary role in other board, society, committee or advocacy group, paid or unpaid            | <input checked="" type="checkbox"/> None                                                     |                                                                                     |
|    |                                                                                                              |                                                                                              |                                                                                     |
|    |                                                                                                              |                                                                                              |                                                                                     |
|    |                                                                                                              |                                                                                              |                                                                                     |

|                                                                                                                                                                                                                                                        |                                                                                  | Name all entities with whom you have this relationship or indicate none (add rows as needed) | Specifications/Comments (e.g., if payments were made to you or to your institution) |
|--------------------------------------------------------------------------------------------------------------------------------------------------------------------------------------------------------------------------------------------------------|----------------------------------------------------------------------------------|----------------------------------------------------------------------------------------------|-------------------------------------------------------------------------------------|
| 11                                                                                                                                                                                                                                                     | Stock or stock options                                                           | <input checked="" type="checkbox"/> None                                                     |                                                                                     |
|                                                                                                                                                                                                                                                        |                                                                                  |                                                                                              |                                                                                     |
|                                                                                                                                                                                                                                                        |                                                                                  |                                                                                              |                                                                                     |
| 12                                                                                                                                                                                                                                                     | Receipt of equipment, materials, drugs, medical writing, gifts or other services | <input checked="" type="checkbox"/> None                                                     |                                                                                     |
|                                                                                                                                                                                                                                                        |                                                                                  |                                                                                              |                                                                                     |
|                                                                                                                                                                                                                                                        |                                                                                  |                                                                                              |                                                                                     |
| 13                                                                                                                                                                                                                                                     | Other financial or non-financial interests                                       | <input checked="" type="checkbox"/> None                                                     |                                                                                     |
|                                                                                                                                                                                                                                                        |                                                                                  |                                                                                              |                                                                                     |
|                                                                                                                                                                                                                                                        |                                                                                  |                                                                                              |                                                                                     |
| <p>Please place an "X" next to the following statement to indicate your agreement:</p> <p><input checked="" type="checkbox"/> I certify that I have answered every question and have not altered the wording of any of the questions on this form.</p> |                                                                                  |                                                                                              |                                                                                     |

### ICMJE DISCLOSURE FORM

**Date:** 6/7/2022

**Your Name:** Takefumi Higashijima

**Manuscript Title:** Preoperative tumor embolization prolongs time to recurrence of meningiomas: A retrospective propensity-matched analysis

**Manuscript Number (if known):** neurintsurg-2022-019080

In the interest of transparency, we ask you to disclose all relationships/activities/interests listed below that are related to the content of your manuscript. "Related" means any relation with for-profit or not-for-profit third parties whose interests may be affected by the content of the manuscript. Disclosure represents a commitment to transparency and does not necessarily indicate a bias. If you are in doubt about whether to list a relationship/activity/interest, it is preferable that you do so.

The author's relationships/activities/interests should be defined broadly. For example, if your manuscript pertains to the epidemiology of hypertension, you should declare all relationships with manufacturers of antihypertensive medication, even if that medication is not mentioned in the manuscript.

In item #1 below, report all support for the work reported in this manuscript without time limit. For all other items, the time frame for disclosure is the past 36 months.

|                                                           |                                                                                                                                                                                | Name all entities with whom you have this relationship or indicate none (add rows as needed)                                                                             | Specifications/Comments (e.g., if payments were made to you or to your institution) |  |  |  |  |  |                                                          |
|-----------------------------------------------------------|--------------------------------------------------------------------------------------------------------------------------------------------------------------------------------|--------------------------------------------------------------------------------------------------------------------------------------------------------------------------|-------------------------------------------------------------------------------------|--|--|--|--|--|----------------------------------------------------------|
| <b>Time frame: Since the initial planning of the work</b> |                                                                                                                                                                                |                                                                                                                                                                          |                                                                                     |  |  |  |  |  |                                                          |
| <b>1</b>                                                  | All support for the present manuscript (e.g., funding, provision of study materials, medical writing, article processing charges, etc.)<br><b>No time limit for this item.</b> | <input checked="" type="checkbox"/> None                                                                                                                                 |                                                                                     |  |  |  |  |  |                                                          |
|                                                           |                                                                                                                                                                                | <table border="1" style="width: 100%;"><tr><td style="width: 50%;"></td><td style="width: 50%;"></td></tr><tr><td></td><td></td></tr><tr><td></td><td></td></tr></table> |                                                                                     |  |  |  |  |  | <small>Click the tab key to add additional rows.</small> |
|                                                           |                                                                                                                                                                                |                                                                                                                                                                          |                                                                                     |  |  |  |  |  |                                                          |
|                                                           |                                                                                                                                                                                |                                                                                                                                                                          |                                                                                     |  |  |  |  |  |                                                          |
|                                                           |                                                                                                                                                                                |                                                                                                                                                                          |                                                                                     |  |  |  |  |  |                                                          |
| <b>Time frame: past 36 months</b>                         |                                                                                                                                                                                |                                                                                                                                                                          |                                                                                     |  |  |  |  |  |                                                          |
| <b>2</b>                                                  | Grants or contracts from any entity (if not indicated in item #1 above).                                                                                                       | <input checked="" type="checkbox"/> None                                                                                                                                 |                                                                                     |  |  |  |  |  |                                                          |
|                                                           |                                                                                                                                                                                | <table border="1" style="width: 100%;"><tr><td style="width: 50%;"></td><td style="width: 50%;"></td></tr><tr><td></td><td></td></tr><tr><td></td><td></td></tr></table> |                                                                                     |  |  |  |  |  |                                                          |
|                                                           |                                                                                                                                                                                |                                                                                                                                                                          |                                                                                     |  |  |  |  |  |                                                          |
|                                                           |                                                                                                                                                                                |                                                                                                                                                                          |                                                                                     |  |  |  |  |  |                                                          |
|                                                           |                                                                                                                                                                                |                                                                                                                                                                          |                                                                                     |  |  |  |  |  |                                                          |
| <b>3</b>                                                  | Royalties or licenses                                                                                                                                                          | <input checked="" type="checkbox"/> None                                                                                                                                 |                                                                                     |  |  |  |  |  |                                                          |
|                                                           |                                                                                                                                                                                | <table border="1" style="width: 100%;"><tr><td style="width: 50%;"></td><td style="width: 50%;"></td></tr><tr><td></td><td></td></tr><tr><td></td><td></td></tr></table> |                                                                                     |  |  |  |  |  |                                                          |
|                                                           |                                                                                                                                                                                |                                                                                                                                                                          |                                                                                     |  |  |  |  |  |                                                          |
|                                                           |                                                                                                                                                                                |                                                                                                                                                                          |                                                                                     |  |  |  |  |  |                                                          |
|                                                           |                                                                                                                                                                                |                                                                                                                                                                          |                                                                                     |  |  |  |  |  |                                                          |

|    |                                                                                                              | Name all entities with whom you have this relationship or indicate none (add rows as needed)                                                                                          | Specifications/Comments (e.g., if payments were made to you or to your institution) |  |  |  |  |  |  |
|----|--------------------------------------------------------------------------------------------------------------|---------------------------------------------------------------------------------------------------------------------------------------------------------------------------------------|-------------------------------------------------------------------------------------|--|--|--|--|--|--|
| 4  | Consulting fees                                                                                              | <input checked="" type="checkbox"/> None<br><br><table border="1" style="width:100%;"><tr><td> </td><td> </td></tr><tr><td> </td><td> </td></tr><tr><td> </td><td> </td></tr></table> |                                                                                     |  |  |  |  |  |  |
|    |                                                                                                              |                                                                                                                                                                                       |                                                                                     |  |  |  |  |  |  |
|    |                                                                                                              |                                                                                                                                                                                       |                                                                                     |  |  |  |  |  |  |
|    |                                                                                                              |                                                                                                                                                                                       |                                                                                     |  |  |  |  |  |  |
| 5  | Payment or honoraria for lectures, presentations, speakers bureaus, manuscript writing or educational events | <input checked="" type="checkbox"/> None<br><br><table border="1" style="width:100%;"><tr><td> </td><td> </td></tr><tr><td> </td><td> </td></tr><tr><td> </td><td> </td></tr></table> |                                                                                     |  |  |  |  |  |  |
|    |                                                                                                              |                                                                                                                                                                                       |                                                                                     |  |  |  |  |  |  |
|    |                                                                                                              |                                                                                                                                                                                       |                                                                                     |  |  |  |  |  |  |
|    |                                                                                                              |                                                                                                                                                                                       |                                                                                     |  |  |  |  |  |  |
| 6  | Payment for expert testimony                                                                                 | <input checked="" type="checkbox"/> None<br><br><table border="1" style="width:100%;"><tr><td> </td><td> </td></tr><tr><td> </td><td> </td></tr><tr><td> </td><td> </td></tr></table> |                                                                                     |  |  |  |  |  |  |
|    |                                                                                                              |                                                                                                                                                                                       |                                                                                     |  |  |  |  |  |  |
|    |                                                                                                              |                                                                                                                                                                                       |                                                                                     |  |  |  |  |  |  |
|    |                                                                                                              |                                                                                                                                                                                       |                                                                                     |  |  |  |  |  |  |
| 7  | Support for attending meetings and/or travel                                                                 | <input checked="" type="checkbox"/> None<br><br><table border="1" style="width:100%;"><tr><td> </td><td> </td></tr><tr><td> </td><td> </td></tr><tr><td> </td><td> </td></tr></table> |                                                                                     |  |  |  |  |  |  |
|    |                                                                                                              |                                                                                                                                                                                       |                                                                                     |  |  |  |  |  |  |
|    |                                                                                                              |                                                                                                                                                                                       |                                                                                     |  |  |  |  |  |  |
|    |                                                                                                              |                                                                                                                                                                                       |                                                                                     |  |  |  |  |  |  |
| 8  | Patents planned, issued or pending                                                                           | <input checked="" type="checkbox"/> None<br><br><table border="1" style="width:100%;"><tr><td> </td><td> </td></tr><tr><td> </td><td> </td></tr><tr><td> </td><td> </td></tr></table> |                                                                                     |  |  |  |  |  |  |
|    |                                                                                                              |                                                                                                                                                                                       |                                                                                     |  |  |  |  |  |  |
|    |                                                                                                              |                                                                                                                                                                                       |                                                                                     |  |  |  |  |  |  |
|    |                                                                                                              |                                                                                                                                                                                       |                                                                                     |  |  |  |  |  |  |
| 9  | Participation on a Data Safety Monitoring Board or Advisory Board                                            | <input checked="" type="checkbox"/> None<br><br><table border="1" style="width:100%;"><tr><td> </td><td> </td></tr><tr><td> </td><td> </td></tr><tr><td> </td><td> </td></tr></table> |                                                                                     |  |  |  |  |  |  |
|    |                                                                                                              |                                                                                                                                                                                       |                                                                                     |  |  |  |  |  |  |
|    |                                                                                                              |                                                                                                                                                                                       |                                                                                     |  |  |  |  |  |  |
|    |                                                                                                              |                                                                                                                                                                                       |                                                                                     |  |  |  |  |  |  |
| 10 | Leadership or fiduciary role in other board, society, committee or advocacy group, paid or unpaid            | <input checked="" type="checkbox"/> None<br><br><table border="1" style="width:100%;"><tr><td> </td><td> </td></tr><tr><td> </td><td> </td></tr><tr><td> </td><td> </td></tr></table> |                                                                                     |  |  |  |  |  |  |
|    |                                                                                                              |                                                                                                                                                                                       |                                                                                     |  |  |  |  |  |  |
|    |                                                                                                              |                                                                                                                                                                                       |                                                                                     |  |  |  |  |  |  |
|    |                                                                                                              |                                                                                                                                                                                       |                                                                                     |  |  |  |  |  |  |

|                                                                                                                                                                                                                                                        |                                                                                  | Name all entities with whom you have this relationship or indicate none (add rows as needed) | Specifications/Comments (e.g., if payments were made to you or to your institution) |
|--------------------------------------------------------------------------------------------------------------------------------------------------------------------------------------------------------------------------------------------------------|----------------------------------------------------------------------------------|----------------------------------------------------------------------------------------------|-------------------------------------------------------------------------------------|
| <b>11</b>                                                                                                                                                                                                                                              | Stock or stock options                                                           | <input checked="" type="checkbox"/> None                                                     |                                                                                     |
|                                                                                                                                                                                                                                                        |                                                                                  |                                                                                              |                                                                                     |
|                                                                                                                                                                                                                                                        |                                                                                  |                                                                                              |                                                                                     |
| <b>12</b>                                                                                                                                                                                                                                              | Receipt of equipment, materials, drugs, medical writing, gifts or other services | <input checked="" type="checkbox"/> None                                                     |                                                                                     |
|                                                                                                                                                                                                                                                        |                                                                                  |                                                                                              |                                                                                     |
|                                                                                                                                                                                                                                                        |                                                                                  |                                                                                              |                                                                                     |
| <b>13</b>                                                                                                                                                                                                                                              | Other financial or non-financial interests                                       | <input checked="" type="checkbox"/> None                                                     |                                                                                     |
|                                                                                                                                                                                                                                                        |                                                                                  |                                                                                              |                                                                                     |
|                                                                                                                                                                                                                                                        |                                                                                  |                                                                                              |                                                                                     |
| <p>Please place an "X" next to the following statement to indicate your agreement:</p> <p><input checked="" type="checkbox"/> I certify that I have answered every question and have not altered the wording of any of the questions on this form.</p> |                                                                                  |                                                                                              |                                                                                     |

### ICMJE DISCLOSURE FORM

**Date:** 6/7/2022

**Your Name:** Taishi Nakamura

**Manuscript Title:** Preoperative tumor embolization prolongs time to recurrence of meningiomas: A retrospective propensity-matched analysis

**Manuscript Number (if known):** neurintsurg-2022-019080

In the interest of transparency, we ask you to disclose all relationships/activities/interests listed below that are related to the content of your manuscript. "Related" means any relation with for-profit or not-for-profit third parties whose interests may be affected by the content of the manuscript. Disclosure represents a commitment to transparency and does not necessarily indicate a bias. If you are in doubt about whether to list a relationship/activity/interest, it is preferable that you do so.

The author's relationships/activities/interests should be defined broadly. For example, if your manuscript pertains to the epidemiology of hypertension, you should declare all relationships with manufacturers of antihypertensive medication, even if that medication is not mentioned in the manuscript.

In item #1 below, report all support for the work reported in this manuscript without time limit. For all other items, the time frame for disclosure is the past 36 months.

|                                                           |                                                                                                                                                                         | Name all entities with whom you have this relationship or indicate none (add rows as needed)                                                                                                                      | Specifications/Comments (e.g., if payments were made to you or to your institution) |  |  |  |                                                         |
|-----------------------------------------------------------|-------------------------------------------------------------------------------------------------------------------------------------------------------------------------|-------------------------------------------------------------------------------------------------------------------------------------------------------------------------------------------------------------------|-------------------------------------------------------------------------------------|--|--|--|---------------------------------------------------------|
| <b>Time frame: Since the initial planning of the work</b> |                                                                                                                                                                         |                                                                                                                                                                                                                   |                                                                                     |  |  |  |                                                         |
| <b>1</b>                                                  | All support for the present manuscript (e.g., funding, provision of study materials, medical writing, article processing charges, etc.)<br>No time limit for this item. | <input checked="" type="checkbox"/> None                                                                                                                                                                          |                                                                                     |  |  |  |                                                         |
|                                                           |                                                                                                                                                                         | <table border="1" style="width: 100%;"><tr><td style="width: 50%; height: 20px;"></td><td style="width: 50%;"></td></tr><tr><td style="width: 50%; height: 20px;"></td><td style="width: 50%;"></td></tr></table> |                                                                                     |  |  |  | <small>Click the tab key to add additional rows</small> |
|                                                           |                                                                                                                                                                         |                                                                                                                                                                                                                   |                                                                                     |  |  |  |                                                         |
|                                                           |                                                                                                                                                                         |                                                                                                                                                                                                                   |                                                                                     |  |  |  |                                                         |
| <b>Time frame: past 36 months</b>                         |                                                                                                                                                                         |                                                                                                                                                                                                                   |                                                                                     |  |  |  |                                                         |
| <b>2</b>                                                  | Grants or contracts from any entity (if not indicated in item #1 above).                                                                                                | <input checked="" type="checkbox"/> None                                                                                                                                                                          |                                                                                     |  |  |  |                                                         |
|                                                           |                                                                                                                                                                         | <table border="1" style="width: 100%;"><tr><td style="width: 50%; height: 20px;"></td><td style="width: 50%;"></td></tr><tr><td style="width: 50%; height: 20px;"></td><td style="width: 50%;"></td></tr></table> |                                                                                     |  |  |  |                                                         |
|                                                           |                                                                                                                                                                         |                                                                                                                                                                                                                   |                                                                                     |  |  |  |                                                         |
|                                                           |                                                                                                                                                                         |                                                                                                                                                                                                                   |                                                                                     |  |  |  |                                                         |
| <b>3</b>                                                  | Royalties or licenses                                                                                                                                                   | <input checked="" type="checkbox"/> None                                                                                                                                                                          |                                                                                     |  |  |  |                                                         |
|                                                           |                                                                                                                                                                         | <table border="1" style="width: 100%;"><tr><td style="width: 50%; height: 20px;"></td><td style="width: 50%;"></td></tr><tr><td style="width: 50%; height: 20px;"></td><td style="width: 50%;"></td></tr></table> |                                                                                     |  |  |  |                                                         |
|                                                           |                                                                                                                                                                         |                                                                                                                                                                                                                   |                                                                                     |  |  |  |                                                         |
|                                                           |                                                                                                                                                                         |                                                                                                                                                                                                                   |                                                                                     |  |  |  |                                                         |

|    |                                                                                                              | Name all entities with whom you have this relationship or indicate none (add rows as needed)                                                                                          | Specifications/Comments (e.g., if payments were made to you or to your institution) |  |  |  |  |  |  |
|----|--------------------------------------------------------------------------------------------------------------|---------------------------------------------------------------------------------------------------------------------------------------------------------------------------------------|-------------------------------------------------------------------------------------|--|--|--|--|--|--|
| 4  | Consulting fees                                                                                              | <input checked="" type="checkbox"/> None<br><br><table border="1" style="width:100%;"><tr><td> </td><td> </td></tr><tr><td> </td><td> </td></tr><tr><td> </td><td> </td></tr></table> |                                                                                     |  |  |  |  |  |  |
|    |                                                                                                              |                                                                                                                                                                                       |                                                                                     |  |  |  |  |  |  |
|    |                                                                                                              |                                                                                                                                                                                       |                                                                                     |  |  |  |  |  |  |
|    |                                                                                                              |                                                                                                                                                                                       |                                                                                     |  |  |  |  |  |  |
| 5  | Payment or honoraria for lectures, presentations, speakers bureaus, manuscript writing or educational events | <input checked="" type="checkbox"/> None<br><br><table border="1" style="width:100%;"><tr><td> </td><td> </td></tr><tr><td> </td><td> </td></tr></table>                              |                                                                                     |  |  |  |  |  |  |
|    |                                                                                                              |                                                                                                                                                                                       |                                                                                     |  |  |  |  |  |  |
|    |                                                                                                              |                                                                                                                                                                                       |                                                                                     |  |  |  |  |  |  |
| 6  | Payment for expert testimony                                                                                 | <input checked="" type="checkbox"/> None<br><br><table border="1" style="width:100%;"><tr><td> </td><td> </td></tr><tr><td> </td><td> </td></tr></table>                              |                                                                                     |  |  |  |  |  |  |
|    |                                                                                                              |                                                                                                                                                                                       |                                                                                     |  |  |  |  |  |  |
|    |                                                                                                              |                                                                                                                                                                                       |                                                                                     |  |  |  |  |  |  |
| 7  | Support for attending meetings and/or travel                                                                 | <input checked="" type="checkbox"/> None<br><br><table border="1" style="width:100%;"><tr><td> </td><td> </td></tr><tr><td> </td><td> </td></tr></table>                              |                                                                                     |  |  |  |  |  |  |
|    |                                                                                                              |                                                                                                                                                                                       |                                                                                     |  |  |  |  |  |  |
|    |                                                                                                              |                                                                                                                                                                                       |                                                                                     |  |  |  |  |  |  |
| 8  | Patents planned, issued or pending                                                                           | <input checked="" type="checkbox"/> None<br><br><table border="1" style="width:100%;"><tr><td> </td><td> </td></tr><tr><td> </td><td> </td></tr></table>                              |                                                                                     |  |  |  |  |  |  |
|    |                                                                                                              |                                                                                                                                                                                       |                                                                                     |  |  |  |  |  |  |
|    |                                                                                                              |                                                                                                                                                                                       |                                                                                     |  |  |  |  |  |  |
| 9  | Participation on a Data Safety Monitoring Board or Advisory Board                                            | <input checked="" type="checkbox"/> None<br><br><table border="1" style="width:100%;"><tr><td> </td><td> </td></tr><tr><td> </td><td> </td></tr></table>                              |                                                                                     |  |  |  |  |  |  |
|    |                                                                                                              |                                                                                                                                                                                       |                                                                                     |  |  |  |  |  |  |
|    |                                                                                                              |                                                                                                                                                                                       |                                                                                     |  |  |  |  |  |  |
| 10 | Leadership or fiduciary role in other board, society, committee or advocacy group, paid or unpaid            | <input checked="" type="checkbox"/> None<br><br><table border="1" style="width:100%;"><tr><td> </td><td> </td></tr><tr><td> </td><td> </td></tr></table>                              |                                                                                     |  |  |  |  |  |  |
|    |                                                                                                              |                                                                                                                                                                                       |                                                                                     |  |  |  |  |  |  |
|    |                                                                                                              |                                                                                                                                                                                       |                                                                                     |  |  |  |  |  |  |

|    |                                                                                  | Name all entities with whom you have this relationship or indicate none (add rows as needed) | Specifications/Comments (e.g., if payments were made to you or to your institution) |
|----|----------------------------------------------------------------------------------|----------------------------------------------------------------------------------------------|-------------------------------------------------------------------------------------|
| 11 | Stock or stock options                                                           | <input checked="" type="checkbox"/> None                                                     |                                                                                     |
|    |                                                                                  |                                                                                              |                                                                                     |
|    |                                                                                  |                                                                                              |                                                                                     |
| 12 | Receipt of equipment, materials, drugs, medical writing, gifts or other services | <input checked="" type="checkbox"/> None                                                     |                                                                                     |
|    |                                                                                  |                                                                                              |                                                                                     |
|    |                                                                                  |                                                                                              |                                                                                     |
| 13 | Other financial or non-financial interests                                       | <input checked="" type="checkbox"/> None                                                     |                                                                                     |
|    |                                                                                  |                                                                                              |                                                                                     |
|    |                                                                                  |                                                                                              |                                                                                     |

Please place an "X" next to the following statement to indicate your agreement:

I certify that I have answered every question and have not altered the wording of any of the questions on this form.



### ICMJE DISCLOSURE FORM

**Date:** 6/7/2022

**Your Name:** Nobuyuki Shimizu

**Manuscript Title:** Preoperative tumor embolization prolongs time to recurrence of meningiomas: A retrospective propensity-matched analysis

**Manuscript Number (if known):** neurintsurg-2022-019080

In the interest of transparency, we ask you to disclose all relationships/activities/interests listed below that are related to the content of your manuscript. "Related" means any relation with for-profit or not-for-profit third parties whose interests may be affected by the content of the manuscript. Disclosure represents a commitment to transparency and does not necessarily indicate a bias. If you are in doubt about whether to list a relationship/activity/interest, it is preferable that you do so.

The author's relationships/activities/interests should be defined broadly. For example, if your manuscript pertains to the epidemiology of hypertension, you should declare all relationships with manufacturers of antihypertensive medication, even if that medication is not mentioned in the manuscript.

In item #1 below, report all support for the work reported in this manuscript without time limit. For all other items, the time frame for disclosure is the past 36 months.

|                                                           |                                                                                                                                                                                | Name all entities with whom you have this relationship or indicate none (add rows as needed)                                               | Specifications/Comments (e.g., if payments were made to you or to your institution) |  |  |  |  |  |  |
|-----------------------------------------------------------|--------------------------------------------------------------------------------------------------------------------------------------------------------------------------------|--------------------------------------------------------------------------------------------------------------------------------------------|-------------------------------------------------------------------------------------|--|--|--|--|--|--|
| <b>Time frame: Since the initial planning of the work</b> |                                                                                                                                                                                |                                                                                                                                            |                                                                                     |  |  |  |  |  |  |
| <b>1</b>                                                  | All support for the present manuscript (e.g., funding, provision of study materials, medical writing, article processing charges, etc.)<br><b>No time limit for this item.</b> | <input checked="" type="checkbox"/> None                                                                                                   |                                                                                     |  |  |  |  |  |  |
|                                                           |                                                                                                                                                                                | <table border="1" style="width: 100%;"> <tr><td> </td><td> </td></tr> <tr><td> </td><td> </td></tr> <tr><td> </td><td> </td></tr> </table> |                                                                                     |  |  |  |  |  |  |
|                                                           |                                                                                                                                                                                |                                                                                                                                            |                                                                                     |  |  |  |  |  |  |
|                                                           |                                                                                                                                                                                |                                                                                                                                            |                                                                                     |  |  |  |  |  |  |
|                                                           |                                                                                                                                                                                |                                                                                                                                            |                                                                                     |  |  |  |  |  |  |
| <b>Time frame: past 36 months</b>                         |                                                                                                                                                                                |                                                                                                                                            |                                                                                     |  |  |  |  |  |  |
| <b>2</b>                                                  | Grants or contracts from any entity (if not indicated in item #1 above).                                                                                                       | <input checked="" type="checkbox"/> None                                                                                                   |                                                                                     |  |  |  |  |  |  |
|                                                           |                                                                                                                                                                                | <table border="1" style="width: 100%;"> <tr><td> </td><td> </td></tr> <tr><td> </td><td> </td></tr> <tr><td> </td><td> </td></tr> </table> |                                                                                     |  |  |  |  |  |  |
|                                                           |                                                                                                                                                                                |                                                                                                                                            |                                                                                     |  |  |  |  |  |  |
|                                                           |                                                                                                                                                                                |                                                                                                                                            |                                                                                     |  |  |  |  |  |  |
|                                                           |                                                                                                                                                                                |                                                                                                                                            |                                                                                     |  |  |  |  |  |  |
| <b>3</b>                                                  | Royalties or licenses                                                                                                                                                          | <input checked="" type="checkbox"/> None                                                                                                   |                                                                                     |  |  |  |  |  |  |
|                                                           |                                                                                                                                                                                | <table border="1" style="width: 100%;"> <tr><td> </td><td> </td></tr> <tr><td> </td><td> </td></tr> <tr><td> </td><td> </td></tr> </table> |                                                                                     |  |  |  |  |  |  |
|                                                           |                                                                                                                                                                                |                                                                                                                                            |                                                                                     |  |  |  |  |  |  |
|                                                           |                                                                                                                                                                                |                                                                                                                                            |                                                                                     |  |  |  |  |  |  |
|                                                           |                                                                                                                                                                                |                                                                                                                                            |                                                                                     |  |  |  |  |  |  |

|    |                                                                                                              | Name all entities with whom you have this relationship or indicate none (add rows as needed)                                                                                          | Specifications/Comments (e.g., if payments were made to you or to your institution) |  |  |  |  |  |  |
|----|--------------------------------------------------------------------------------------------------------------|---------------------------------------------------------------------------------------------------------------------------------------------------------------------------------------|-------------------------------------------------------------------------------------|--|--|--|--|--|--|
| 4  | Consulting fees                                                                                              | <input checked="" type="checkbox"/> None<br><br><table border="1" style="width:100%;"><tr><td> </td><td> </td></tr><tr><td> </td><td> </td></tr><tr><td> </td><td> </td></tr></table> |                                                                                     |  |  |  |  |  |  |
|    |                                                                                                              |                                                                                                                                                                                       |                                                                                     |  |  |  |  |  |  |
|    |                                                                                                              |                                                                                                                                                                                       |                                                                                     |  |  |  |  |  |  |
|    |                                                                                                              |                                                                                                                                                                                       |                                                                                     |  |  |  |  |  |  |
| 5  | Payment or honoraria for lectures, presentations, speakers bureaus, manuscript writing or educational events | <input checked="" type="checkbox"/> None<br><br><table border="1" style="width:100%;"><tr><td> </td><td> </td></tr><tr><td> </td><td> </td></tr><tr><td> </td><td> </td></tr></table> |                                                                                     |  |  |  |  |  |  |
|    |                                                                                                              |                                                                                                                                                                                       |                                                                                     |  |  |  |  |  |  |
|    |                                                                                                              |                                                                                                                                                                                       |                                                                                     |  |  |  |  |  |  |
|    |                                                                                                              |                                                                                                                                                                                       |                                                                                     |  |  |  |  |  |  |
| 6  | Payment for expert testimony                                                                                 | <input checked="" type="checkbox"/> None<br><br><table border="1" style="width:100%;"><tr><td> </td><td> </td></tr><tr><td> </td><td> </td></tr><tr><td> </td><td> </td></tr></table> |                                                                                     |  |  |  |  |  |  |
|    |                                                                                                              |                                                                                                                                                                                       |                                                                                     |  |  |  |  |  |  |
|    |                                                                                                              |                                                                                                                                                                                       |                                                                                     |  |  |  |  |  |  |
|    |                                                                                                              |                                                                                                                                                                                       |                                                                                     |  |  |  |  |  |  |
| 7  | Support for attending meetings and/or travel                                                                 | <input checked="" type="checkbox"/> None<br><br><table border="1" style="width:100%;"><tr><td> </td><td> </td></tr><tr><td> </td><td> </td></tr><tr><td> </td><td> </td></tr></table> |                                                                                     |  |  |  |  |  |  |
|    |                                                                                                              |                                                                                                                                                                                       |                                                                                     |  |  |  |  |  |  |
|    |                                                                                                              |                                                                                                                                                                                       |                                                                                     |  |  |  |  |  |  |
|    |                                                                                                              |                                                                                                                                                                                       |                                                                                     |  |  |  |  |  |  |
| 8  | Patents planned, issued or pending                                                                           | <input checked="" type="checkbox"/> None<br><br><table border="1" style="width:100%;"><tr><td> </td><td> </td></tr><tr><td> </td><td> </td></tr><tr><td> </td><td> </td></tr></table> |                                                                                     |  |  |  |  |  |  |
|    |                                                                                                              |                                                                                                                                                                                       |                                                                                     |  |  |  |  |  |  |
|    |                                                                                                              |                                                                                                                                                                                       |                                                                                     |  |  |  |  |  |  |
|    |                                                                                                              |                                                                                                                                                                                       |                                                                                     |  |  |  |  |  |  |
| 9  | Participation on a Data Safety Monitoring Board or Advisory Board                                            | <input checked="" type="checkbox"/> None<br><br><table border="1" style="width:100%;"><tr><td> </td><td> </td></tr><tr><td> </td><td> </td></tr><tr><td> </td><td> </td></tr></table> |                                                                                     |  |  |  |  |  |  |
|    |                                                                                                              |                                                                                                                                                                                       |                                                                                     |  |  |  |  |  |  |
|    |                                                                                                              |                                                                                                                                                                                       |                                                                                     |  |  |  |  |  |  |
|    |                                                                                                              |                                                                                                                                                                                       |                                                                                     |  |  |  |  |  |  |
| 10 | Leadership or fiduciary role in other board, society, committee or advocacy group, paid or unpaid            | <input checked="" type="checkbox"/> None<br><br><table border="1" style="width:100%;"><tr><td> </td><td> </td></tr><tr><td> </td><td> </td></tr><tr><td> </td><td> </td></tr></table> |                                                                                     |  |  |  |  |  |  |
|    |                                                                                                              |                                                                                                                                                                                       |                                                                                     |  |  |  |  |  |  |
|    |                                                                                                              |                                                                                                                                                                                       |                                                                                     |  |  |  |  |  |  |
|    |                                                                                                              |                                                                                                                                                                                       |                                                                                     |  |  |  |  |  |  |

|                                                                                                                                                                                                                                                               |                                                                                  | Name all entities with whom you have this relationship or indicate none (add rows as needed)                                                              | Specifications/Comments (e.g., if payments were made to you or to your institution) |  |  |  |  |
|---------------------------------------------------------------------------------------------------------------------------------------------------------------------------------------------------------------------------------------------------------------|----------------------------------------------------------------------------------|-----------------------------------------------------------------------------------------------------------------------------------------------------------|-------------------------------------------------------------------------------------|--|--|--|--|
| 11                                                                                                                                                                                                                                                            | Stock or stock options                                                           | <input checked="" type="checkbox"/> None<br><br><table border="1" style="width: 100%;"><tr><td> </td><td> </td></tr><tr><td> </td><td> </td></tr></table> |                                                                                     |  |  |  |  |
|                                                                                                                                                                                                                                                               |                                                                                  |                                                                                                                                                           |                                                                                     |  |  |  |  |
|                                                                                                                                                                                                                                                               |                                                                                  |                                                                                                                                                           |                                                                                     |  |  |  |  |
| 12                                                                                                                                                                                                                                                            | Receipt of equipment, materials, drugs, medical writing, gifts or other services | <input checked="" type="checkbox"/> None<br><br><table border="1" style="width: 100%;"><tr><td> </td><td> </td></tr><tr><td> </td><td> </td></tr></table> |                                                                                     |  |  |  |  |
|                                                                                                                                                                                                                                                               |                                                                                  |                                                                                                                                                           |                                                                                     |  |  |  |  |
|                                                                                                                                                                                                                                                               |                                                                                  |                                                                                                                                                           |                                                                                     |  |  |  |  |
| 13                                                                                                                                                                                                                                                            | Other financial or non-financial interests                                       | <input checked="" type="checkbox"/> None<br><br><table border="1" style="width: 100%;"><tr><td> </td><td> </td></tr><tr><td> </td><td> </td></tr></table> |                                                                                     |  |  |  |  |
|                                                                                                                                                                                                                                                               |                                                                                  |                                                                                                                                                           |                                                                                     |  |  |  |  |
|                                                                                                                                                                                                                                                               |                                                                                  |                                                                                                                                                           |                                                                                     |  |  |  |  |
| <p><b>Please place an "X" next to the following statement to indicate your agreement:</b></p> <p><input checked="" type="checkbox"/> I certify that I have answered every question and have not altered the wording of any of the questions on this form.</p> |                                                                                  |                                                                                                                                                           |                                                                                     |  |  |  |  |

## ICMJE DISCLOSURE FORM

**Date:** 6/7/2022

**Your Name:** Takashi Kawasaki

**Manuscript Title:** Preoperative tumor embolization prolongs time to recurrence of meningiomas: A retrospective propensity-matched analysis

**Manuscript Number (if known):** neurintsurg-2022-019080

In the interest of transparency, we ask you to disclose all relationships/activities/interests listed below that are related to the content of your manuscript. "Related" means any relation with for-profit or not-for-profit third parties whose interests may be affected by the content of the manuscript. Disclosure represents a commitment to transparency and does not necessarily indicate a bias. If you are in doubt about whether to list a relationship/activity/interest, it is preferable that you do so.

The author's relationships/activities/interests should be defined broadly. For example, if your manuscript pertains to the epidemiology of hypertension, you should declare all relationships with manufacturers of antihypertensive medication, even if that medication is not mentioned in the manuscript.

In item #1 below, report all support for the work reported in this manuscript without time limit. For all other items, the time frame for disclosure is the past 36 months.

|                                                           |                                                                                                                                                                                | Name all entities with whom you have this relationship or indicate none (add rows as needed) | Specifications/Comments (e.g., if payments were made to you or to your institution) |  |                                          |
|-----------------------------------------------------------|--------------------------------------------------------------------------------------------------------------------------------------------------------------------------------|----------------------------------------------------------------------------------------------|-------------------------------------------------------------------------------------|--|------------------------------------------|
| <b>Time frame: Since the initial planning of the work</b> |                                                                                                                                                                                |                                                                                              |                                                                                     |  |                                          |
| <b>1</b>                                                  | All support for the present manuscript (e.g., funding, provision of study materials, medical writing, article processing charges, etc.)<br><b>No time limit for this item.</b> | <input checked="" type="checkbox"/> <b>None</b>                                              |                                                                                     |  |                                          |
|                                                           |                                                                                                                                                                                | <table border="1" style="width: 100%; height: 20px;"><tr><td></td><td></td></tr></table>     |                                                                                     |  |                                          |
|                                                           |                                                                                                                                                                                |                                                                                              |                                                                                     |  |                                          |
|                                                           |                                                                                                                                                                                | <table border="1" style="width: 100%; height: 20px;"><tr><td></td><td></td></tr></table>     |                                                                                     |  |                                          |
|                                                           |                                                                                                                                                                                |                                                                                              |                                                                                     |  |                                          |
|                                                           |                                                                                                                                                                                | <table border="1" style="width: 100%; height: 20px;"><tr><td></td><td></td></tr></table>     |                                                                                     |  | Click the tab key to add additional rows |
|                                                           |                                                                                                                                                                                |                                                                                              |                                                                                     |  |                                          |
| <b>Time frame: past 36 months</b>                         |                                                                                                                                                                                |                                                                                              |                                                                                     |  |                                          |
| <b>2</b>                                                  | Grants or contracts from any entity (if not indicated in item #1 above).                                                                                                       | <input checked="" type="checkbox"/> <b>None</b>                                              |                                                                                     |  |                                          |
|                                                           |                                                                                                                                                                                | <table border="1" style="width: 100%; height: 20px;"><tr><td></td><td></td></tr></table>     |                                                                                     |  |                                          |
|                                                           |                                                                                                                                                                                |                                                                                              |                                                                                     |  |                                          |
|                                                           |                                                                                                                                                                                | <table border="1" style="width: 100%; height: 20px;"><tr><td></td><td></td></tr></table>     |                                                                                     |  |                                          |
|                                                           |                                                                                                                                                                                |                                                                                              |                                                                                     |  |                                          |
|                                                           |                                                                                                                                                                                | <table border="1" style="width: 100%; height: 20px;"><tr><td></td><td></td></tr></table>     |                                                                                     |  |                                          |
|                                                           |                                                                                                                                                                                |                                                                                              |                                                                                     |  |                                          |
| <b>3</b>                                                  | Royalties or licenses                                                                                                                                                          | <input checked="" type="checkbox"/> <b>None</b>                                              |                                                                                     |  |                                          |
|                                                           |                                                                                                                                                                                | <table border="1" style="width: 100%; height: 20px;"><tr><td></td><td></td></tr></table>     |                                                                                     |  |                                          |
|                                                           |                                                                                                                                                                                |                                                                                              |                                                                                     |  |                                          |
|                                                           |                                                                                                                                                                                | <table border="1" style="width: 100%; height: 20px;"><tr><td></td><td></td></tr></table>     |                                                                                     |  |                                          |
|                                                           |                                                                                                                                                                                |                                                                                              |                                                                                     |  |                                          |
|                                                           |                                                                                                                                                                                | <table border="1" style="width: 100%; height: 20px;"><tr><td></td><td></td></tr></table>     |                                                                                     |  |                                          |
|                                                           |                                                                                                                                                                                |                                                                                              |                                                                                     |  |                                          |

|    |                                                                                                              | Name all entities with whom you have this relationship or indicate none (add rows as needed) | Specifications/Comments (e.g., if payments were made to you or to your institution) |
|----|--------------------------------------------------------------------------------------------------------------|----------------------------------------------------------------------------------------------|-------------------------------------------------------------------------------------|
| 4  | Consulting fees                                                                                              | <input checked="" type="checkbox"/> None                                                     |                                                                                     |
|    |                                                                                                              |                                                                                              |                                                                                     |
|    |                                                                                                              |                                                                                              |                                                                                     |
|    |                                                                                                              |                                                                                              |                                                                                     |
| 5  | Payment or honoraria for lectures, presentations, speakers bureaus, manuscript writing or educational events | <input checked="" type="checkbox"/> None                                                     |                                                                                     |
|    |                                                                                                              |                                                                                              |                                                                                     |
|    |                                                                                                              |                                                                                              |                                                                                     |
|    |                                                                                                              |                                                                                              |                                                                                     |
| 6  | Payment for expert testimony                                                                                 | <input checked="" type="checkbox"/> None                                                     |                                                                                     |
|    |                                                                                                              |                                                                                              |                                                                                     |
|    |                                                                                                              |                                                                                              |                                                                                     |
|    |                                                                                                              |                                                                                              |                                                                                     |
| 7  | Support for attending meetings and/or travel                                                                 | <input checked="" type="checkbox"/> None                                                     |                                                                                     |
|    |                                                                                                              |                                                                                              |                                                                                     |
|    |                                                                                                              |                                                                                              |                                                                                     |
|    |                                                                                                              |                                                                                              |                                                                                     |
| 8  | Patents planned, issued or pending                                                                           | <input checked="" type="checkbox"/> None                                                     |                                                                                     |
|    |                                                                                                              |                                                                                              |                                                                                     |
|    |                                                                                                              |                                                                                              |                                                                                     |
|    |                                                                                                              |                                                                                              |                                                                                     |
| 9  | Participation on a Data Safety Monitoring Board or Advisory Board                                            | <input checked="" type="checkbox"/> None                                                     |                                                                                     |
|    |                                                                                                              |                                                                                              |                                                                                     |
|    |                                                                                                              |                                                                                              |                                                                                     |
|    |                                                                                                              |                                                                                              |                                                                                     |
| 10 | Leadership or fiduciary role in other board, society, committee or advocacy group, paid or unpaid            | <input checked="" type="checkbox"/> None                                                     |                                                                                     |
|    |                                                                                                              |                                                                                              |                                                                                     |
|    |                                                                                                              |                                                                                              |                                                                                     |
|    |                                                                                                              |                                                                                              |                                                                                     |

|    |                                                                                  | Name all entities with whom you have this relationship or indicate none (add rows as needed) | Specifications/Comments (e.g., if payments were made to you or to your institution) |
|----|----------------------------------------------------------------------------------|----------------------------------------------------------------------------------------------|-------------------------------------------------------------------------------------|
| 11 | Stock or stock options                                                           | <input checked="" type="checkbox"/> None                                                     |                                                                                     |
|    |                                                                                  |                                                                                              |                                                                                     |
|    |                                                                                  |                                                                                              |                                                                                     |
| 12 | Receipt of equipment, materials, drugs, medical writing, gifts or other services | <input checked="" type="checkbox"/> None                                                     |                                                                                     |
|    |                                                                                  |                                                                                              |                                                                                     |
|    |                                                                                  |                                                                                              |                                                                                     |
| 13 | Other financial or non-financial interests                                       | <input checked="" type="checkbox"/> None                                                     |                                                                                     |
|    |                                                                                  |                                                                                              |                                                                                     |
|    |                                                                                  |                                                                                              |                                                                                     |

Please place an "X" next to the following statement to indicate your agreement:

I certify that I have answered every question and have not altered the wording of any of the questions on this form.

## ICMJE DISCLOSURE FORM

**Date:** 6/7/2022

**Your Name:** Katumi Sakata

**Manuscript Title:** Preoperative tumor embolization prolongs time to recurrence of meningiomas: A retrospective propensity-matched analysis

**Manuscript Number (if known):** neurintsurg-2022-019080

In the interest of transparency, we ask you to disclose all relationships/activities/interests listed below that are related to the content of your manuscript. "Related" means any relation with for-profit or not-for-profit third parties whose interests may be affected by the content of the manuscript. Disclosure represents a commitment to transparency and does not necessarily indicate a bias. If you are in doubt about whether to list a relationship/activity/interest, it is preferable that you do so.

The author's relationships/activities/interests should be defined broadly. For example, if your manuscript pertains to the epidemiology of hypertension, you should declare all relationships with manufacturers of antihypertensive medication, even if that medication is not mentioned in the manuscript.

In item #1 below, report all support for the work reported in this manuscript without time limit. For all other items, the time frame for disclosure is the past 36 months.

|                                                           |                                                                                                                                                                                | Name all entities with whom you have this relationship or indicate none (add rows as needed)                                                                                                                                              | Specifications/Comments (e.g., if payments were made to you or to your institution) |  |  |  |  |  |                                          |
|-----------------------------------------------------------|--------------------------------------------------------------------------------------------------------------------------------------------------------------------------------|-------------------------------------------------------------------------------------------------------------------------------------------------------------------------------------------------------------------------------------------|-------------------------------------------------------------------------------------|--|--|--|--|--|------------------------------------------|
| <b>Time frame: Since the initial planning of the work</b> |                                                                                                                                                                                |                                                                                                                                                                                                                                           |                                                                                     |  |  |  |  |  |                                          |
| <b>1</b>                                                  | All support for the present manuscript (e.g., funding, provision of study materials, medical writing, article processing charges, etc.)<br><b>No time limit for this item.</b> | <input checked="" type="checkbox"/> None<br><table border="1" style="width: 100%; margin-top: 5px;"> <tr><td style="width: 60%;"></td><td style="width: 40%;"></td></tr> <tr><td></td><td></td></tr> <tr><td></td><td></td></tr> </table> |                                                                                     |  |  |  |  |  | Click the tab key to add additional rows |
|                                                           |                                                                                                                                                                                |                                                                                                                                                                                                                                           |                                                                                     |  |  |  |  |  |                                          |
|                                                           |                                                                                                                                                                                |                                                                                                                                                                                                                                           |                                                                                     |  |  |  |  |  |                                          |
|                                                           |                                                                                                                                                                                |                                                                                                                                                                                                                                           |                                                                                     |  |  |  |  |  |                                          |
| <b>Time frame: past 36 months</b>                         |                                                                                                                                                                                |                                                                                                                                                                                                                                           |                                                                                     |  |  |  |  |  |                                          |
| <b>2</b>                                                  | Grants or contracts from any entity (if not indicated in item #1 above).                                                                                                       | <input checked="" type="checkbox"/> None<br><table border="1" style="width: 100%; margin-top: 5px;"> <tr><td style="width: 60%;"></td><td style="width: 40%;"></td></tr> <tr><td></td><td></td></tr> <tr><td></td><td></td></tr> </table> |                                                                                     |  |  |  |  |  |                                          |
|                                                           |                                                                                                                                                                                |                                                                                                                                                                                                                                           |                                                                                     |  |  |  |  |  |                                          |
|                                                           |                                                                                                                                                                                |                                                                                                                                                                                                                                           |                                                                                     |  |  |  |  |  |                                          |
|                                                           |                                                                                                                                                                                |                                                                                                                                                                                                                                           |                                                                                     |  |  |  |  |  |                                          |
| <b>3</b>                                                  | Royalties or licenses                                                                                                                                                          | <input checked="" type="checkbox"/> None<br><table border="1" style="width: 100%; margin-top: 5px;"> <tr><td style="width: 60%;"></td><td style="width: 40%;"></td></tr> <tr><td></td><td></td></tr> <tr><td></td><td></td></tr> </table> |                                                                                     |  |  |  |  |  |                                          |
|                                                           |                                                                                                                                                                                |                                                                                                                                                                                                                                           |                                                                                     |  |  |  |  |  |                                          |
|                                                           |                                                                                                                                                                                |                                                                                                                                                                                                                                           |                                                                                     |  |  |  |  |  |                                          |
|                                                           |                                                                                                                                                                                |                                                                                                                                                                                                                                           |                                                                                     |  |  |  |  |  |                                          |

|    |                                                                                                              | Name all entities with whom you have this relationship or indicate none (add rows as needed) | Specifications/Comments (e.g., if payments were made to you or to your institution) |
|----|--------------------------------------------------------------------------------------------------------------|----------------------------------------------------------------------------------------------|-------------------------------------------------------------------------------------|
| 4  | Consulting fees                                                                                              | <input checked="" type="checkbox"/> None                                                     |                                                                                     |
|    |                                                                                                              |                                                                                              |                                                                                     |
|    |                                                                                                              |                                                                                              |                                                                                     |
| 5  | Payment or honoraria for lectures, presentations, speakers bureaus, manuscript writing or educational events | <input checked="" type="checkbox"/> None                                                     |                                                                                     |
|    |                                                                                                              |                                                                                              |                                                                                     |
|    |                                                                                                              |                                                                                              |                                                                                     |
| 6  | Payment for expert testimony                                                                                 | <input checked="" type="checkbox"/> None                                                     |                                                                                     |
|    |                                                                                                              |                                                                                              |                                                                                     |
|    |                                                                                                              |                                                                                              |                                                                                     |
| 7  | Support for attending meetings and/or travel                                                                 | <input checked="" type="checkbox"/> None                                                     |                                                                                     |
|    |                                                                                                              |                                                                                              |                                                                                     |
|    |                                                                                                              |                                                                                              |                                                                                     |
| 8  | Patents planned, issued or pending                                                                           | <input checked="" type="checkbox"/> None                                                     |                                                                                     |
|    |                                                                                                              |                                                                                              |                                                                                     |
|    |                                                                                                              |                                                                                              |                                                                                     |
| 9  | Participation on a Data Safety Monitoring Board or Advisory Board                                            | <input checked="" type="checkbox"/> None                                                     |                                                                                     |
|    |                                                                                                              |                                                                                              |                                                                                     |
|    |                                                                                                              |                                                                                              |                                                                                     |
| 10 | Leadership or fiduciary role in other board, society, committee or advocacy group, paid or unpaid            | <input checked="" type="checkbox"/> None                                                     |                                                                                     |
|    |                                                                                                              |                                                                                              |                                                                                     |
|    |                                                                                                              |                                                                                              |                                                                                     |



|           |                                                                                  | Name all entities with whom you have this relationship or indicate none (add rows as needed) | Specifications/Comments (e.g., if payments were made to you or to your institution) |
|-----------|----------------------------------------------------------------------------------|----------------------------------------------------------------------------------------------|-------------------------------------------------------------------------------------|
| <b>11</b> | Stock or stock options                                                           | <input checked="" type="checkbox"/> None                                                     |                                                                                     |
|           |                                                                                  |                                                                                              |                                                                                     |
|           |                                                                                  |                                                                                              |                                                                                     |
| <b>12</b> | Receipt of equipment, materials, drugs, medical writing, gifts or other services | <input checked="" type="checkbox"/> None                                                     |                                                                                     |
|           |                                                                                  |                                                                                              |                                                                                     |
|           |                                                                                  |                                                                                              |                                                                                     |
| <b>13</b> | Other financial or non-financial interests                                       | <input checked="" type="checkbox"/> None                                                     |                                                                                     |
|           |                                                                                  |                                                                                              |                                                                                     |
|           |                                                                                  |                                                                                              |                                                                                     |

Please place an "X" next to the following statement to indicate your agreement:

I certify that I have answered every question and have not altered the wording of any of the questions on this form.

## ICMJE DISCLOSURE FORM

**Date:** 6/7/2022

**Your Name:** Tetsuya Yamamoto

**Manuscript Title:** Preoperative tumor embolization prolongs time to recurrence of meningiomas: A retrospective propensity-matched analysis

**Manuscript Number (if known):** neurintsurg-2022-019080

In the interest of transparency, we ask you to disclose all relationships/activities/interests listed below that are related to the content of your manuscript. "Related" means any relation with for-profit or not-for-profit third parties whose interests may be affected by the content of the manuscript. Disclosure represents a commitment to transparency and does not necessarily indicate a bias. If you are in doubt about whether to list a relationship/activity/interest, it is preferable that you do so.

The author's relationships/activities/interests should be defined broadly. For example, if your manuscript pertains to the epidemiology of hypertension, you should declare all relationships with manufacturers of antihypertensive medication, even if that medication is not mentioned in the manuscript.

In item #1 below, report all support for the work reported in this manuscript without time limit. For all other items, the time frame for disclosure is the past 36 months.

|                                                           | Name all entities with whom you have this relationship or indicate none (add rows as needed)                                                                                   | Specifications/Comments (e.g., if payments were made to you or to your institution)                                                                                                                                                                                                                                                                                                            |  |  |  |  |  |  |
|-----------------------------------------------------------|--------------------------------------------------------------------------------------------------------------------------------------------------------------------------------|------------------------------------------------------------------------------------------------------------------------------------------------------------------------------------------------------------------------------------------------------------------------------------------------------------------------------------------------------------------------------------------------|--|--|--|--|--|--|
| <b>Time frame: Since the initial planning of the work</b> |                                                                                                                                                                                |                                                                                                                                                                                                                                                                                                                                                                                                |  |  |  |  |  |  |
| <b>1</b>                                                  | All support for the present manuscript (e.g., funding, provision of study materials, medical writing, article processing charges, etc.)<br><b>No time limit for this item.</b> | <input checked="" type="checkbox"/> <b>None</b><br><table border="1" style="width: 100%; border-collapse: collapse; margin-top: 5px;"> <tr><td style="width: 60%; height: 20px;"></td><td style="width: 40%;"></td></tr> <tr><td style="height: 20px;"></td><td></td></tr> <tr><td style="height: 20px;"></td><td></td></tr> </table> <small>Click the Tab key to add additional rows.</small> |  |  |  |  |  |  |
|                                                           |                                                                                                                                                                                |                                                                                                                                                                                                                                                                                                                                                                                                |  |  |  |  |  |  |
|                                                           |                                                                                                                                                                                |                                                                                                                                                                                                                                                                                                                                                                                                |  |  |  |  |  |  |
|                                                           |                                                                                                                                                                                |                                                                                                                                                                                                                                                                                                                                                                                                |  |  |  |  |  |  |
| <b>Time frame: past 36 months</b>                         |                                                                                                                                                                                |                                                                                                                                                                                                                                                                                                                                                                                                |  |  |  |  |  |  |
| <b>2</b>                                                  | Grants or contracts from any entity (if not indicated in item #1 above).                                                                                                       | <input checked="" type="checkbox"/> <b>None</b><br><table border="1" style="width: 100%; border-collapse: collapse; margin-top: 5px;"> <tr><td style="width: 60%; height: 20px;"></td><td style="width: 40%;"></td></tr> <tr><td style="height: 20px;"></td><td></td></tr> <tr><td style="height: 20px;"></td><td></td></tr> </table>                                                          |  |  |  |  |  |  |
|                                                           |                                                                                                                                                                                |                                                                                                                                                                                                                                                                                                                                                                                                |  |  |  |  |  |  |
|                                                           |                                                                                                                                                                                |                                                                                                                                                                                                                                                                                                                                                                                                |  |  |  |  |  |  |
|                                                           |                                                                                                                                                                                |                                                                                                                                                                                                                                                                                                                                                                                                |  |  |  |  |  |  |
| <b>3</b>                                                  | Royalties or licenses                                                                                                                                                          | <input checked="" type="checkbox"/> <b>None</b><br><table border="1" style="width: 100%; border-collapse: collapse; margin-top: 5px;"> <tr><td style="width: 60%; height: 20px;"></td><td style="width: 40%;"></td></tr> <tr><td style="height: 20px;"></td><td></td></tr> <tr><td style="height: 20px;"></td><td></td></tr> </table>                                                          |  |  |  |  |  |  |
|                                                           |                                                                                                                                                                                |                                                                                                                                                                                                                                                                                                                                                                                                |  |  |  |  |  |  |
|                                                           |                                                                                                                                                                                |                                                                                                                                                                                                                                                                                                                                                                                                |  |  |  |  |  |  |
|                                                           |                                                                                                                                                                                |                                                                                                                                                                                                                                                                                                                                                                                                |  |  |  |  |  |  |

|    |                                                                                                              | Name all entities with whom you have this relationship or indicate none (add rows as needed) | Specifications/Comments (e.g., if payments were made to you or to your institution) |
|----|--------------------------------------------------------------------------------------------------------------|----------------------------------------------------------------------------------------------|-------------------------------------------------------------------------------------|
| 4  | Consulting fees                                                                                              | <input checked="" type="checkbox"/> None                                                     |                                                                                     |
|    |                                                                                                              |                                                                                              |                                                                                     |
|    |                                                                                                              |                                                                                              |                                                                                     |
|    |                                                                                                              |                                                                                              |                                                                                     |
| 5  | Payment or honoraria for lectures, presentations, speakers bureaus, manuscript writing or educational events | <input checked="" type="checkbox"/> None                                                     |                                                                                     |
|    |                                                                                                              |                                                                                              |                                                                                     |
|    |                                                                                                              |                                                                                              |                                                                                     |
|    |                                                                                                              |                                                                                              |                                                                                     |
| 6  | Payment for expert testimony                                                                                 | <input checked="" type="checkbox"/> None                                                     |                                                                                     |
|    |                                                                                                              |                                                                                              |                                                                                     |
|    |                                                                                                              |                                                                                              |                                                                                     |
|    |                                                                                                              |                                                                                              |                                                                                     |
| 7  | Support for attending meetings and/or travel                                                                 | <input checked="" type="checkbox"/> None                                                     |                                                                                     |
|    |                                                                                                              |                                                                                              |                                                                                     |
|    |                                                                                                              |                                                                                              |                                                                                     |
|    |                                                                                                              |                                                                                              |                                                                                     |
| 8  | Patents planned, issued or pending                                                                           | <input checked="" type="checkbox"/> None                                                     |                                                                                     |
|    |                                                                                                              |                                                                                              |                                                                                     |
|    |                                                                                                              |                                                                                              |                                                                                     |
|    |                                                                                                              |                                                                                              |                                                                                     |
| 9  | Participation on a Data Safety Monitoring Board or Advisory Board                                            | <input checked="" type="checkbox"/> None                                                     |                                                                                     |
|    |                                                                                                              |                                                                                              |                                                                                     |
|    |                                                                                                              |                                                                                              |                                                                                     |
|    |                                                                                                              |                                                                                              |                                                                                     |
| 10 | Leadership or fiduciary role in other board, society, committee or advocacy group, paid or unpaid            | <input checked="" type="checkbox"/> None                                                     |                                                                                     |
|    |                                                                                                              |                                                                                              |                                                                                     |
|    |                                                                                                              |                                                                                              |                                                                                     |
|    |                                                                                                              |                                                                                              |                                                                                     |

|                                                                                                                                                                                                                                                               |                                                                                  | Name all entities with whom you have this relationship or indicate none (add rows as needed) | Specifications/Comments (e.g., if payments were made to you or to your institution) |
|---------------------------------------------------------------------------------------------------------------------------------------------------------------------------------------------------------------------------------------------------------------|----------------------------------------------------------------------------------|----------------------------------------------------------------------------------------------|-------------------------------------------------------------------------------------|
| <b>11</b>                                                                                                                                                                                                                                                     | Stock or stock options                                                           | <input checked="" type="checkbox"/> None                                                     |                                                                                     |
|                                                                                                                                                                                                                                                               |                                                                                  |                                                                                              |                                                                                     |
|                                                                                                                                                                                                                                                               |                                                                                  |                                                                                              |                                                                                     |
| <b>12</b>                                                                                                                                                                                                                                                     | Receipt of equipment, materials, drugs, medical writing, gifts or other services | <input checked="" type="checkbox"/> None                                                     |                                                                                     |
|                                                                                                                                                                                                                                                               |                                                                                  |                                                                                              |                                                                                     |
|                                                                                                                                                                                                                                                               |                                                                                  |                                                                                              |                                                                                     |
| <b>13</b>                                                                                                                                                                                                                                                     | Other financial or non-financial interests                                       | <input checked="" type="checkbox"/> None                                                     |                                                                                     |
|                                                                                                                                                                                                                                                               |                                                                                  |                                                                                              |                                                                                     |
|                                                                                                                                                                                                                                                               |                                                                                  |                                                                                              |                                                                                     |
| <p><b>Please place an "X" next to the following statement to indicate your agreement:</b></p> <p><input checked="" type="checkbox"/> I certify that I have answered every question and have not altered the wording of any of the questions on this form.</p> |                                                                                  |                                                                                              |                                                                                     |
